# Supplementary material for: Mycobacterium tuberculosis Inhibitors Based on Arylated Quinoline Carboxylic Acid Backbones with Anti-Mtb Gyrase Activity
Source: MDPI journal article supplement (doi:10.3390/ijms241411632), 2023-07-19
Supplement: s1 [file s1]

## Supporting Information for

# ***Mycobacterium tuberculosis* inhibitors based on arylated quinoline carboxylic acid backbones with anti-*Mtb* gyrase activity**

**Mark Tristan J. Quimque, Adrian D. Go, Justin Allen K. Lim, Warren S. Vidar,  
and Allan Patrick G. Macabeo\***

<sup>1</sup>The Graduate School, University of Santo Tomas, España Blvd., Manila 1015  
Philippines

<sup>2</sup>Laboratory for Organic Reactivity, Discovery and Synthesis (Rm. 410) Research Center  
for the Natural and Applied Sciences University of Santo Tomas Espana Blvd., Manila  
1015, Philippines

<sup>3</sup>Chemistry Department, College of Science and Mathematics, Mindanao State  
University – Iligan Institute of Technology, Tibanga, Iligan City, Philippines

\*Corresponding author: A. P. G. Macabeo (agmacabeo@ust.edu.ph)

## TABLE OF CONTENTS

|                                                                                                  |    |
|--------------------------------------------------------------------------------------------------|----|
| <b>Figure S1.</b> 600 MHz $^1\text{H}$ NMR spectrum of <b>1d</b> ( $\text{DMSO}-d_6$ ).....      | 4  |
| <b>Figure S2.</b> 151 MHz $^{13}\text{C}$ NMR spectrum of <b>1d</b> ( $\text{DMSO}-d_6$ ).....   | 4  |
| <b>Figure S3.</b> 600 MHz $^{13}\text{H}$ NMR spectrum of <b>1o</b> ( $\text{DMSO}-d_6$ ).....   | 5  |
| <b>Figure S4.</b> 151 MHz $^{13}\text{C}$ NMR spectrum of <b>1o</b> ( $\text{DMSO}-d_6$ ).....   | 5  |
| <b>Figure S5.</b> 600 MHz $^1\text{H}$ NMR spectrum of <b>1p</b> ( $\text{MeOH}-d_4$ ) .....     | 6  |
| <b>Figure S6.</b> 151 MHz $^{13}\text{C}$ NMR spectrum of <b>1p</b> ( $\text{MeOH}-d_4$ ) .....  | 6  |
| <b>Figure S7.</b> 600 MHz $^1\text{H}$ NMR spectrum of <b>6b</b> ( $\text{DMSO}-d_6$ ).....      | 7  |
| <b>Figure S8.</b> 151 MHz $^{13}\text{C}$ NMR spectrum of <b>6b</b> ( $\text{DMSO}-d_6$ ).....   | 7  |
| <b>Figure S9.</b> 600 MHz $^{13}\text{C}$ NMR spectrum of <b>6c</b> ( $\text{DMSO}-d_6$ ) .....  | 8  |
| <b>Figure S10.</b> 151 MHz $^{13}\text{C}$ NMR spectrum of <b>6c</b> ( $\text{DMSO}-d_6$ ) ..... | 8  |
| <b>Figure S11.</b> 600 MHz $^1\text{H}$ NMR spectrum of <b>6d</b> ( $\text{DMSO}-d_6$ ).....     | 9  |
| <b>Figure S12.</b> 151 MHz $^{13}\text{C}$ NMR spectrum of <b>6d</b> ( $\text{DMSO}-d_6$ ).....  | 9  |
| <b>Figure S13.</b> 600 MHz $^{13}\text{C}$ NMR spectrum of <b>6g</b> ( $\text{DMSO}-d_6$ ).....  | 10 |
| <b>Figure S14.</b> 151 MHz $^{13}\text{C}$ NMR spectrum of <b>6g</b> ( $\text{DMSO}-d_6$ ).....  | 10 |
| <b>Figure S15.</b> 600 MHz $^1\text{H}$ NMR spectrum of <b>6h</b> ( $\text{DMSO}-d_6$ ).....     | 11 |
| <b>Figure S16.</b> 151 MHz $^{13}\text{C}$ NMR spectrum of <b>6h</b> ( $\text{DMSO}-d_6$ ).....  | 11 |
| <b>Figure S17.</b> 600 MHz $^1\text{H}$ NMR spectrum of <b>6i</b> ( $\text{DMSO}-d_6$ ).....     | 12 |
| <b>Figure S18.</b> 151 MHz $^{13}\text{C}$ NMR spectrum of <b>6i</b> ( $\text{DMSO}-d_6$ ).....  | 12 |
| <b>Figure S19.</b> 600 MHz $^1\text{H}$ NMR spectrum of <b>6j</b> ( $\text{DMSO}-d_6$ ).....     | 13 |
| <b>Figure S20.</b> 151 MHz $^{13}\text{C}$ NMR spectrum of <b>6j</b> ( $\text{DMSO}-d_6$ ).....  | 13 |
| <b>Figure S21.</b> 600 MHz $^1\text{H}$ NMR spectrum of <b>6k</b> ( $\text{DMSO}-d_6$ ).....     | 14 |
| <b>Figure S22.</b> 151 MHz $^{13}\text{C}$ NMR spectrum of <b>6k</b> ( $\text{DMSO}-d_6$ ).....  | 14 |
| <b>Figure S23.</b> 600 MHz $^1\text{H}$ NMR spectrum of <b>6l</b> ( $\text{DMSO}-d_6$ ).....     | 15 |
| <b>Figure S24.</b> 151 MHz $^{13}\text{C}$ NMR spectrum of <b>6l</b> ( $\text{DMSO}-d_6$ ).....  | 15 |
| <b>Figure S25.</b> 600 MHz $^1\text{H}$ NMR spectrum of <b>6n</b> ( $\text{DMSO}-d_6$ ).....     | 16 |
| <b>Figure S26.</b> 151 MHz $^{13}\text{C}$ NMR spectrum of <b>6n</b> ( $\text{DMSO}-d_6$ ).....  | 16 |
| <b>Figure S27.</b> 600 MHz $^1\text{H}$ NMR spectrum of <b>6p</b> ( $\text{DMSO}-d_6$ ).....     | 17 |
| <b>Figure S28.</b> 151 MHz $^{13}\text{C}$ NMR spectrum of <b>6p</b> ( $\text{DMSO}-d_6$ ).....  | 17 |
| <b>Figure S29.</b> 600 MHz $^1\text{H}$ NMR spectrum of <b>6q</b> ( $\text{DMSO}-d_6$ ).....     | 18 |
| <b>Figure S30.</b> 151 MHz $^{13}\text{C}$ NMR spectrum of <b>6q</b> ( $\text{DMSO}-d_6$ ).....  | 18 |
| <b>Figure S31.</b> 600 MHz $^1\text{H}$ NMR spectrum of <b>6r</b> ( $\text{DMSO}-d_6$ ) .....    | 19 |

|                                                                                                                                                                                                                   |    |
|-------------------------------------------------------------------------------------------------------------------------------------------------------------------------------------------------------------------|----|
| <b>Figure S32.</b> 151 MHz $^{13}\text{C}$ NMR spectrum of <b>6r</b> (DMSO- $d_6$ ).....                                                                                                                          | 19 |
| <b>Figure S33.</b> 600 MHz $^1\text{H}$ NMR spectrum of <b>7b</b> (DMSO- $d_6$ ).....                                                                                                                             | 20 |
| <b>Figure S34.</b> 151 MHz $^{13}\text{C}$ NMR spectrum of <b>7b</b> (DMSO- $d_6$ ).....                                                                                                                          | 20 |
| <b>Figure S35.</b> 600 MHz $^1\text{H}$ NMR spectrum of <b>7c</b> (MeOH- $d_4$ ).....                                                                                                                             | 21 |
| <b>Figure S36.</b> 151 MHz $^{13}\text{C}$ NMR spectrum of <b>7c</b> (MeOH- $d_4$ ).....                                                                                                                          | 21 |
| <b>Figure S37.</b> 600 MHz $^1\text{H}$ NMR spectrum of <b>7d</b> (MeOH- $d_4$ ).....                                                                                                                             | 22 |
| <b>Figure S38.</b> 151 MHz $^{13}\text{C}$ NMR spectrum of <b>7d</b> (MeOH- $d_4$ ).....                                                                                                                          | 22 |
| <b>Figure S39.</b> 600 MHz $^1\text{H}$ NMR spectrum of <b>7g</b> (DMSO- $d_6$ ).....                                                                                                                             | 23 |
| <b>Figure S40.</b> 151 MHz $^{13}\text{C}$ NMR spectrum of <b>7g</b> (DMSO- $d_6$ ).....                                                                                                                          | 23 |
| <b>Figure S41.</b> 600 MHz $^1\text{H}$ NMR spectrum of <b>7h</b> (MeOH- $d_4$ ).....                                                                                                                             | 24 |
| <b>Figure S42.</b> 151 MHz $^{13}\text{C}$ NMR spectrum of <b>7h</b> (MeOH- $d_4$ ).....                                                                                                                          | 24 |
| <b>Figure S43.</b> 600 MHz $^1\text{H}$ NMR spectrum of <b>7i</b> (DMSO- $d_6$ ).....                                                                                                                             | 25 |
| <b>Figure S44.</b> 151 MHz $^{13}\text{C}$ NMR spectrum of <b>7i</b> (DMSO- $d_6$ ).....                                                                                                                          | 25 |
| <b>Figure S45.</b> 600 MHz $^1\text{H}$ NMR spectrum of <b>7j</b> (DMSO- $d_6$ ).....                                                                                                                             | 26 |
| <b>Figure S46.</b> 151 MHz $^{13}\text{C}$ NMR spectrum of <b>7j</b> (DMSO- $d_6$ ).....                                                                                                                          | 26 |
| <b>Figure S47.</b> 600 MHz $^1\text{H}$ NMR spectrum of <b>7k</b> (DMSO- $d_6$ ).....                                                                                                                             | 27 |
| <b>Figure S48.</b> 151 MHz $^{13}\text{C}$ NMR spectrum of <b>7k</b> (DMSO- $d_6$ ).....                                                                                                                          | 27 |
| <b>Figure S49.</b> 600 MHz $^1\text{H}$ NMR spectrum of <b>7l</b> (DMSO- $d_6$ ).....                                                                                                                             | 28 |
| <b>Figure S50.</b> 151 MHz $^{13}\text{C}$ NMR spectrum of <b>7l</b> (DMSO- $d_6$ ).....                                                                                                                          | 28 |
| <b>Figure S51.</b> 600 MHz $^1\text{H}$ NMR spectrum of <b>7m</b> (DMSO- $d_6$ ).....                                                                                                                             | 29 |
| <b>Figure S52.</b> 151 MHz $^{13}\text{C}$ NMR spectrum of <b>7m</b> (MeOH- $d_4$ ).....                                                                                                                          | 29 |
| <b>Figure S53.</b> 600 MHz $^1\text{H}$ NMR spectrum of <b>7n</b> (MeOH- $d_4$ ).....                                                                                                                             | 30 |
| <b>Figure S54.</b> 151 MHz $^{13}\text{C}$ NMR spectrum of <b>7n</b> (MeOH- $d_4$ ).....                                                                                                                          | 30 |
| <b>Figure S55.</b> Agarose gel electrophoresis result showing inhibition of QCA <b>7i</b> and <b>7m</b> against <i>Mtb</i> DNA gyrase; (-) negative control without gyrase; (+) positive control with gyrase..... | 32 |

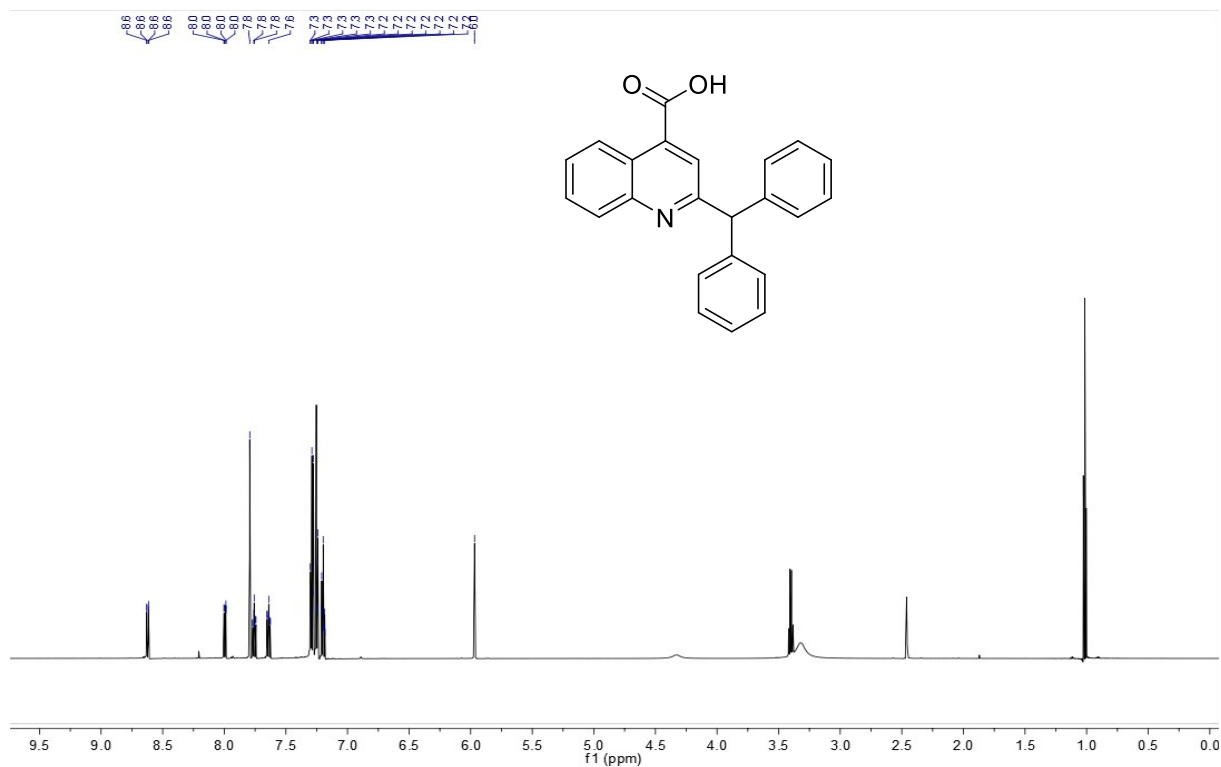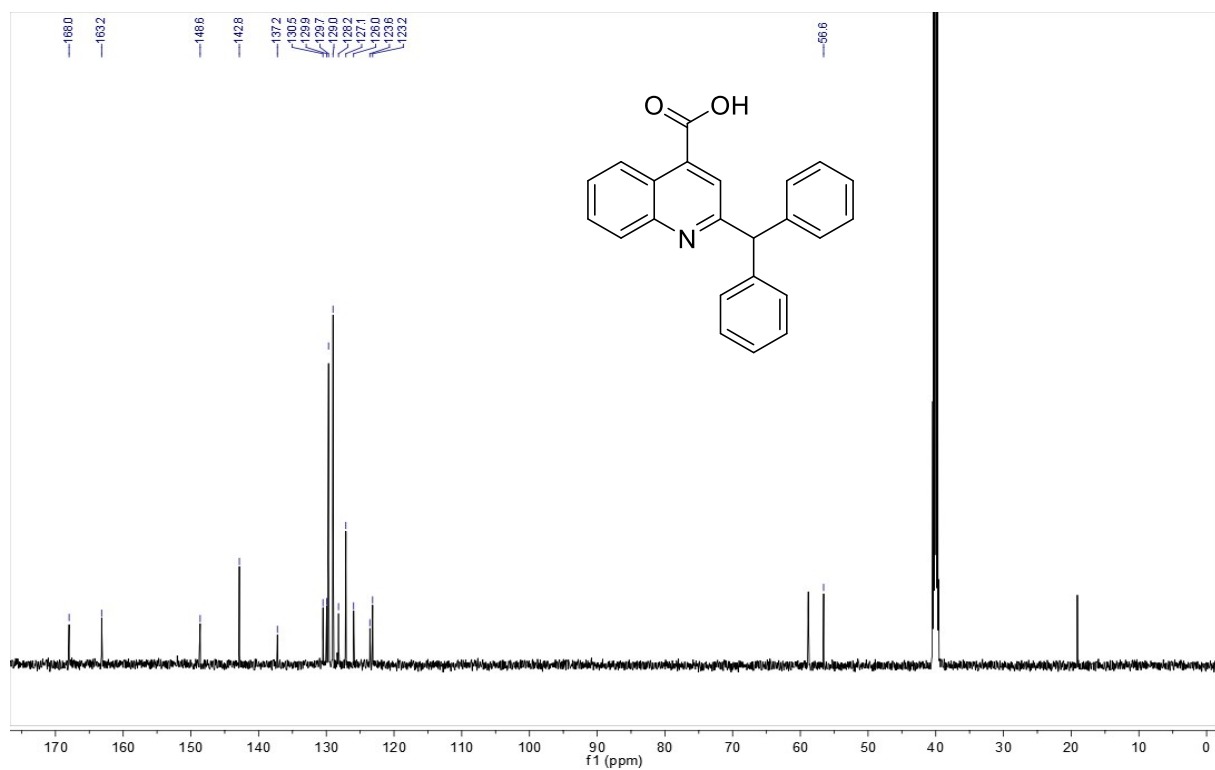

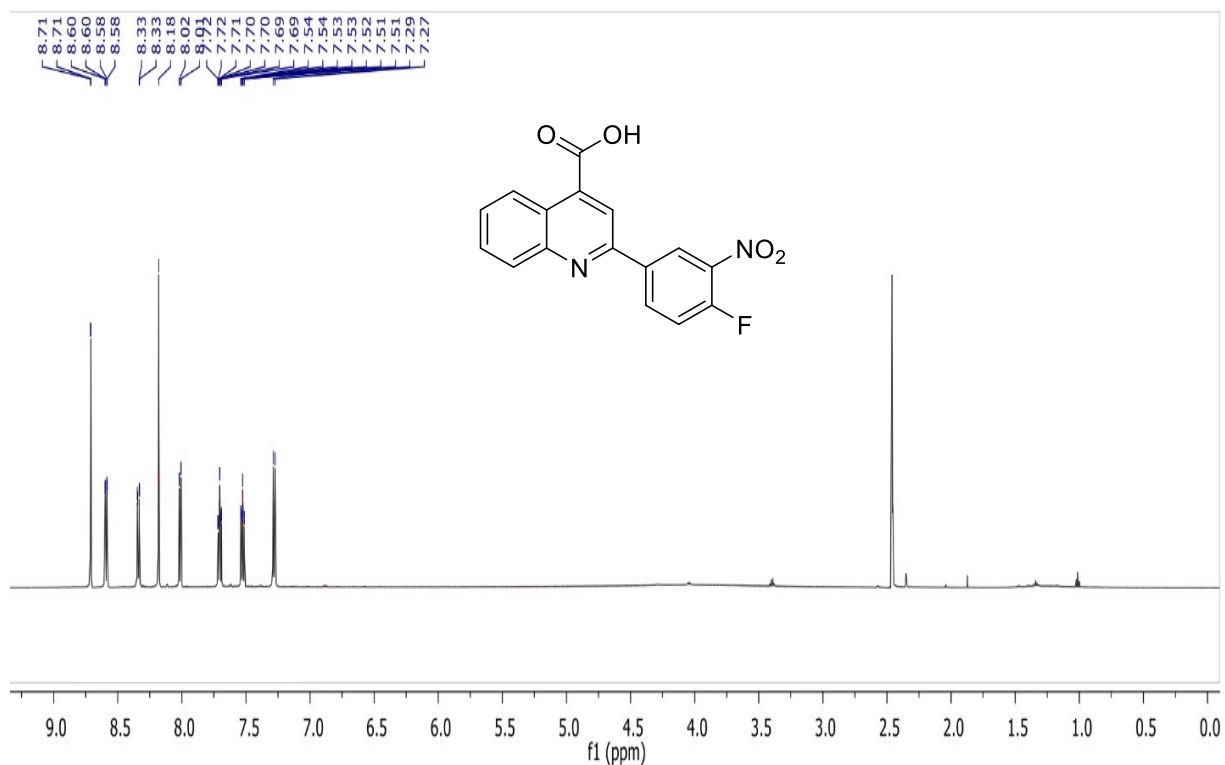

**Figure S3.** 600 MHz <sup>1</sup>H NMR spectrum of **1o** (DMSO-*d*<sub>6</sub>)

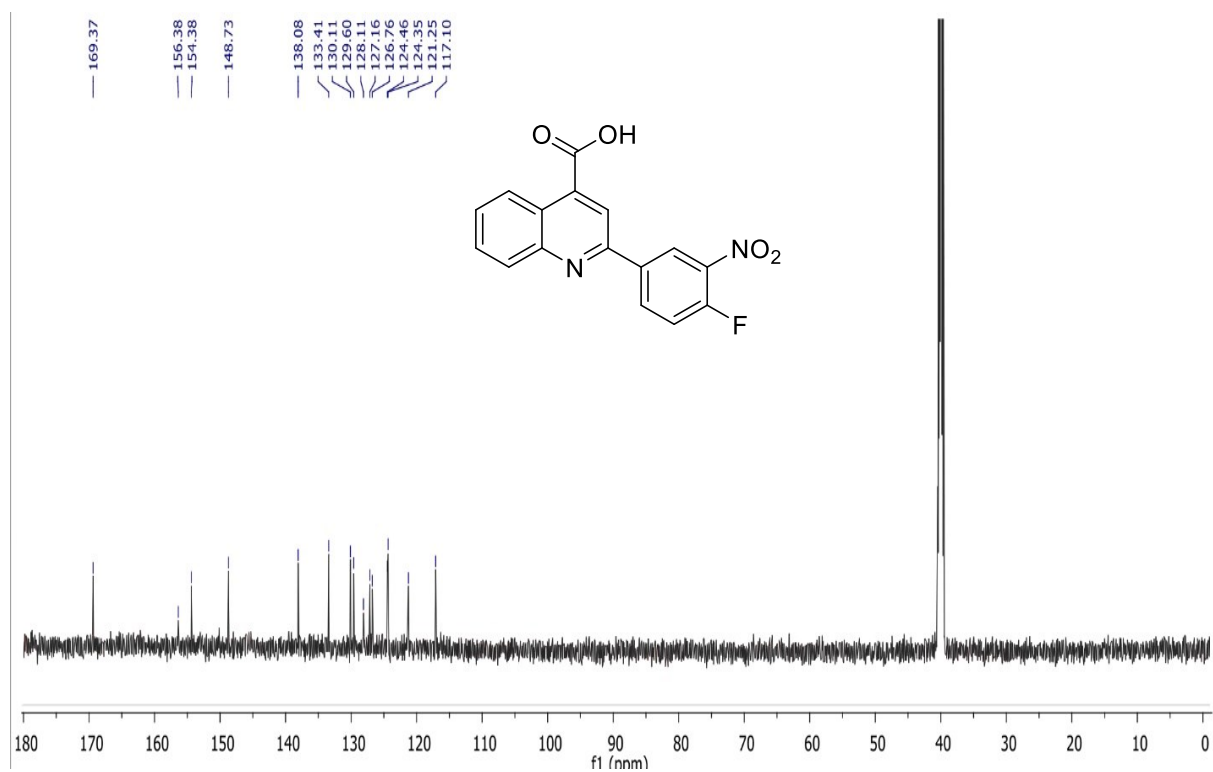

**Figure S4.** 151 MHz <sup>13</sup>C NMR spectrum of **1o** (DMSO-*d*<sub>6</sub>)

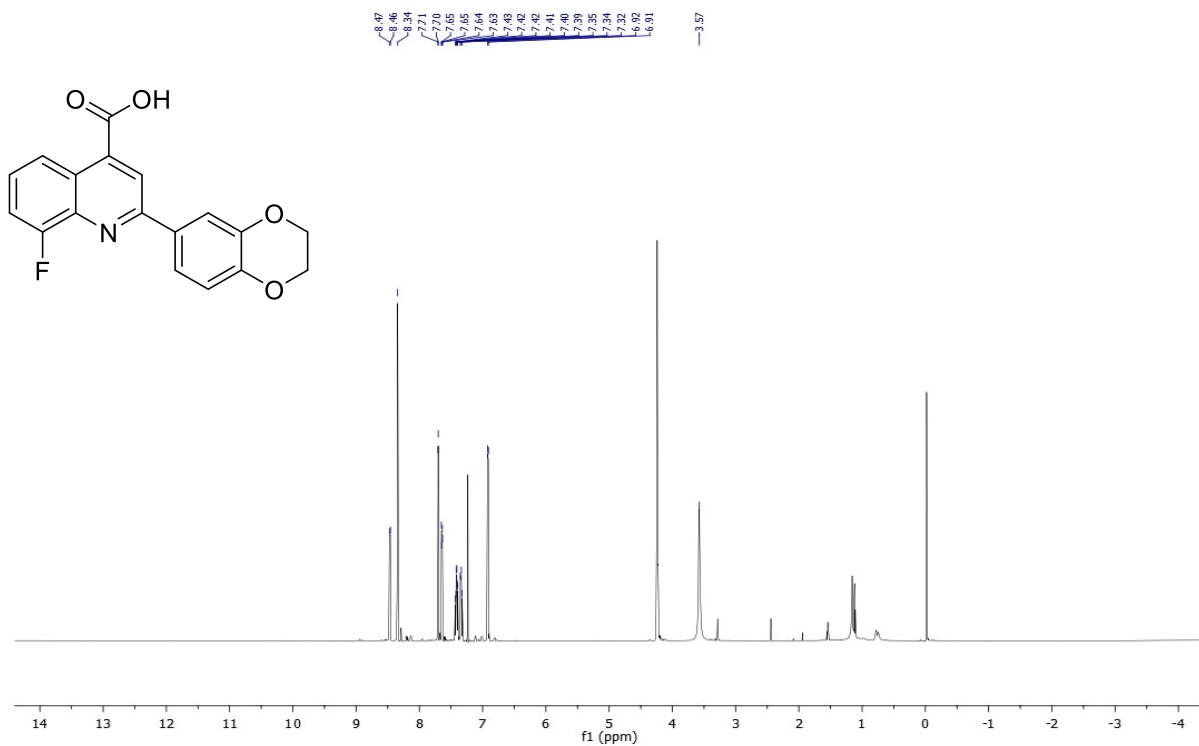

**Figure S5.** 600 MHz <sup>1</sup>H NMR spectrum of **1p** (MeOH-*d*<sub>4</sub>)

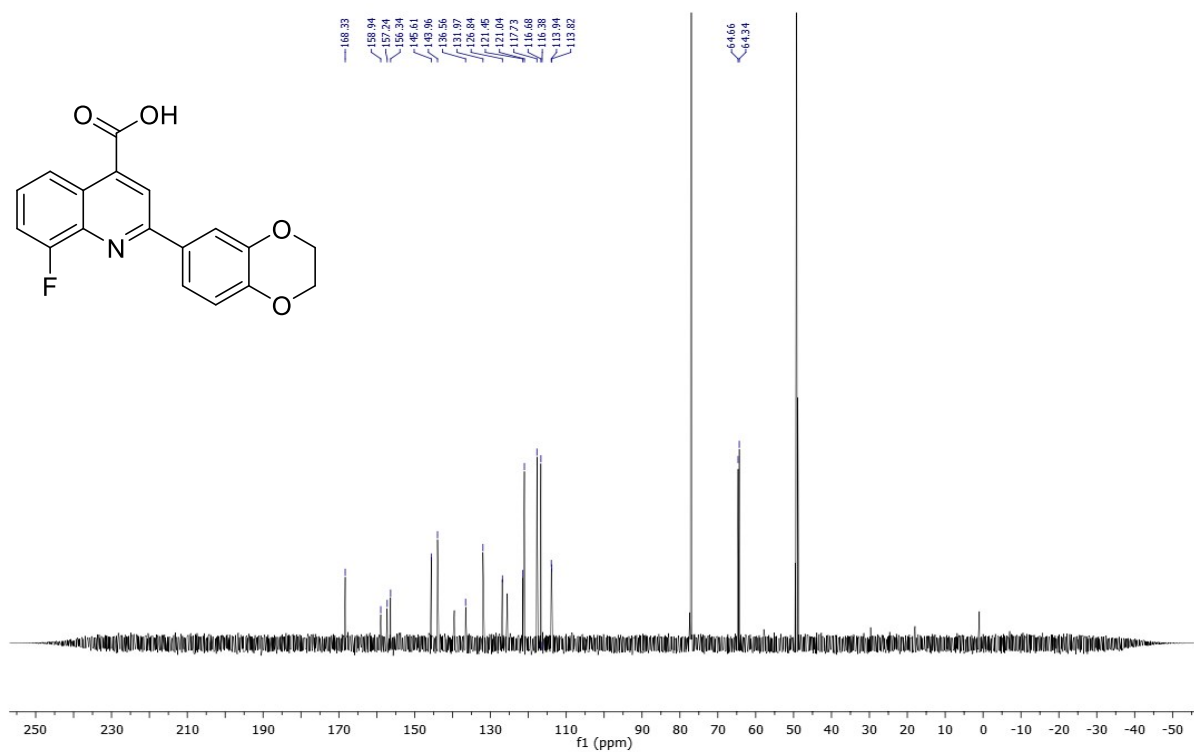

**Figure S6.** 151 MHz <sup>13</sup>C NMR spectrum of **1p** (MeOH-*d*<sub>4</sub>)

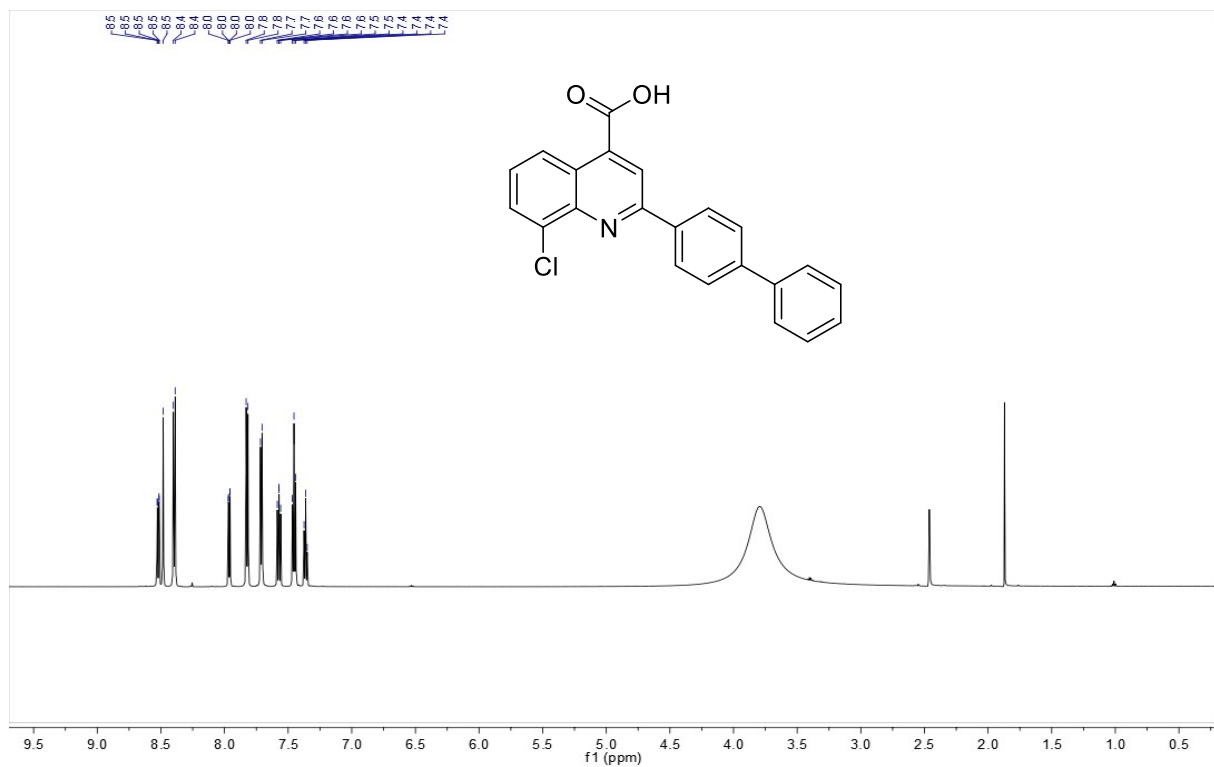

**Figure S7.** 600 MHz <sup>1</sup>H NMR spectrum of **6b** (DMSO-*d*<sub>6</sub>)

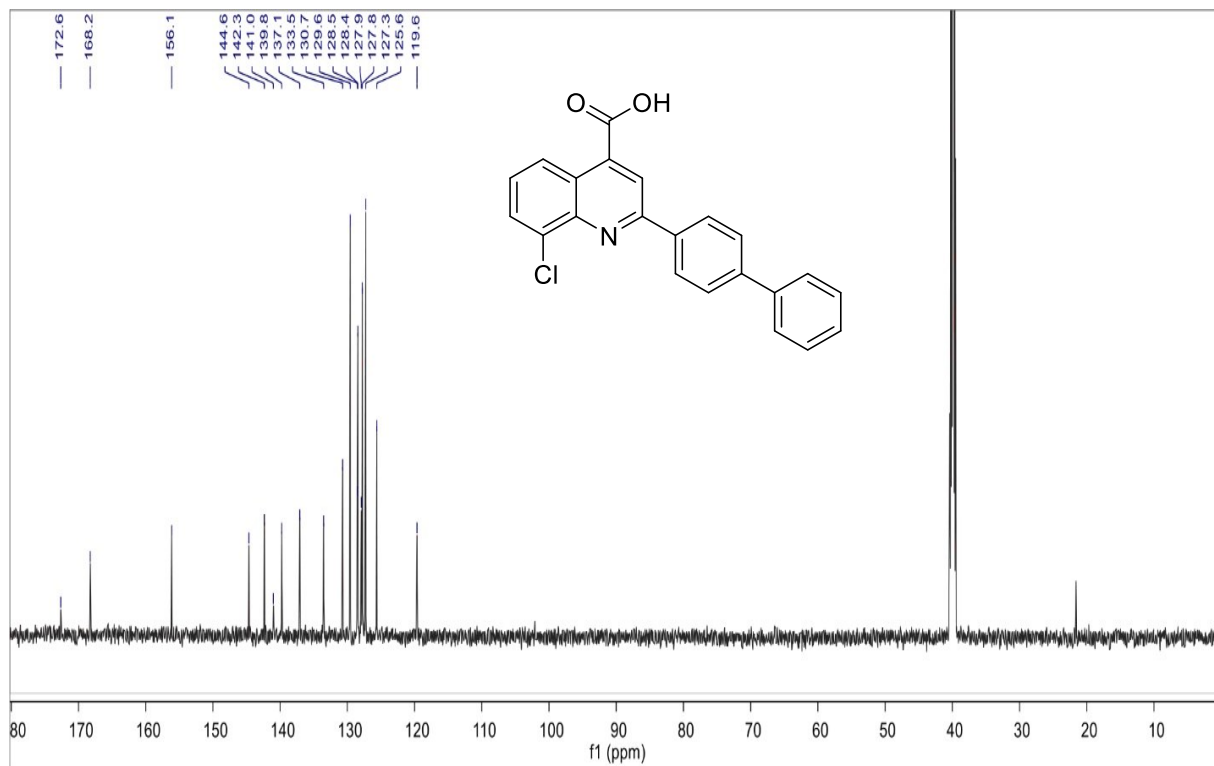

**Figure S8.** 151 MHz <sup>13</sup>C NMR spectrum of **6b** (DMSO-*d*<sub>6</sub>)

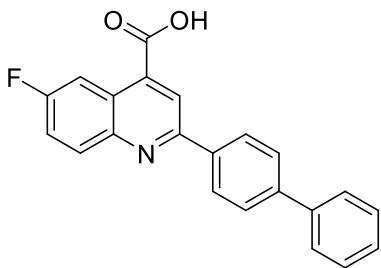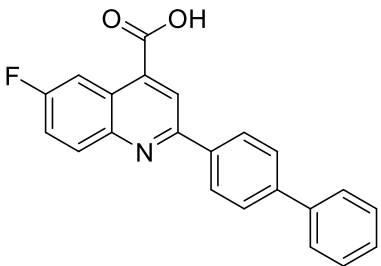

**Figure S10.** 151 MHz  $^{13}\text{C}$  NMR spectrum of **6c** (DMSO- $d_6$ )



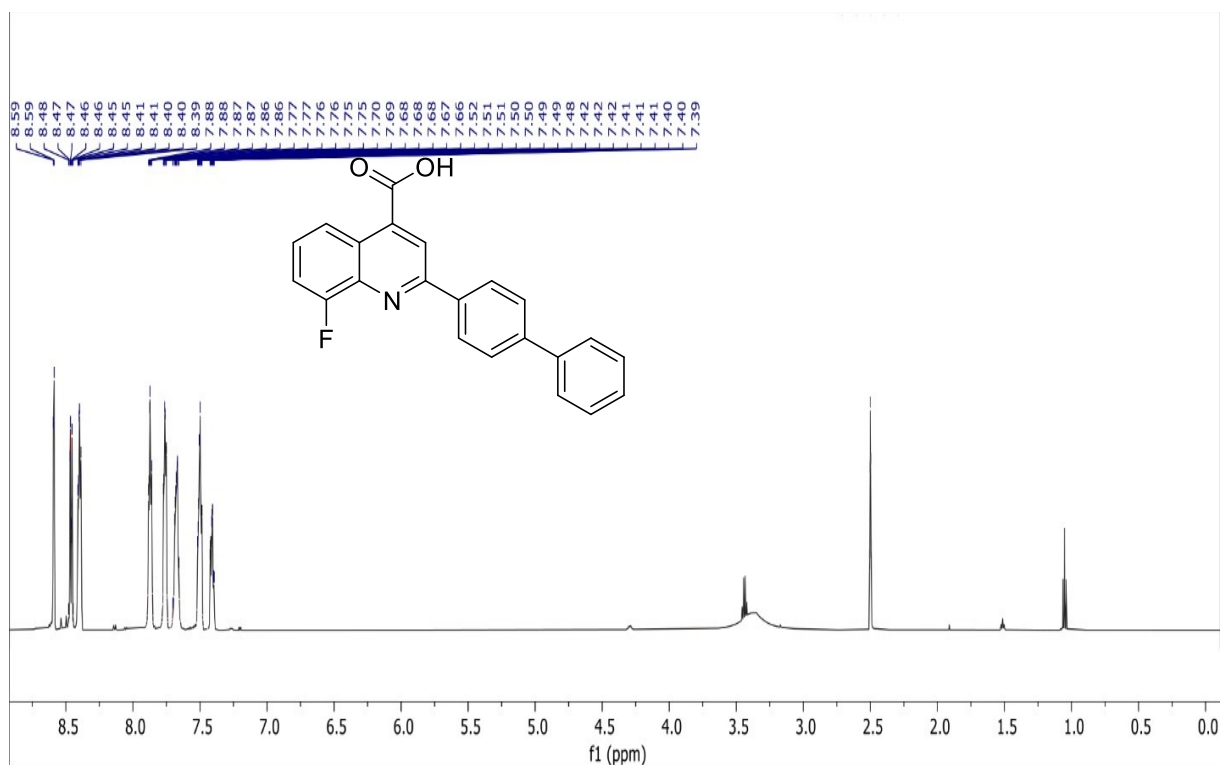

Figure S11. 600 MHz <sup>1</sup>H NMR spectrum of **6d** (DMSO-*d*<sub>6</sub>)

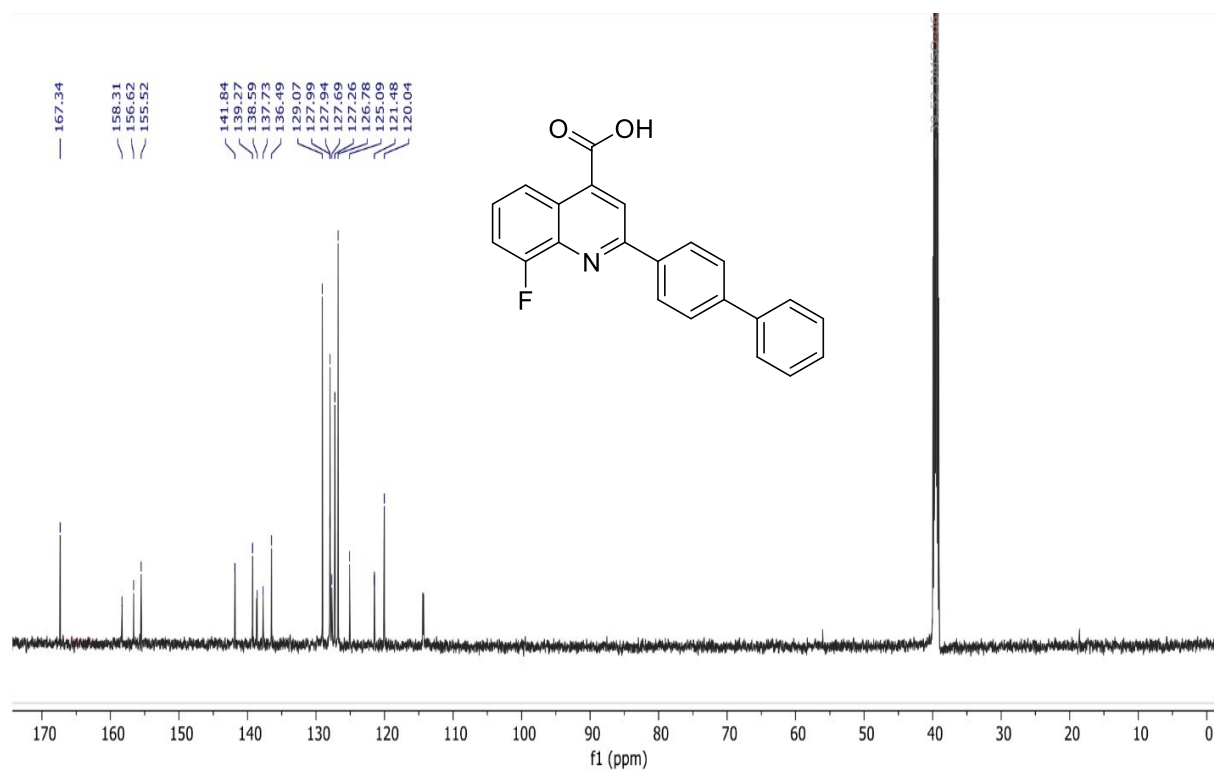

Figure S12. 151 MHz <sup>13</sup>C NMR spectrum of **6d** (DMSO-*d*<sub>6</sub>)

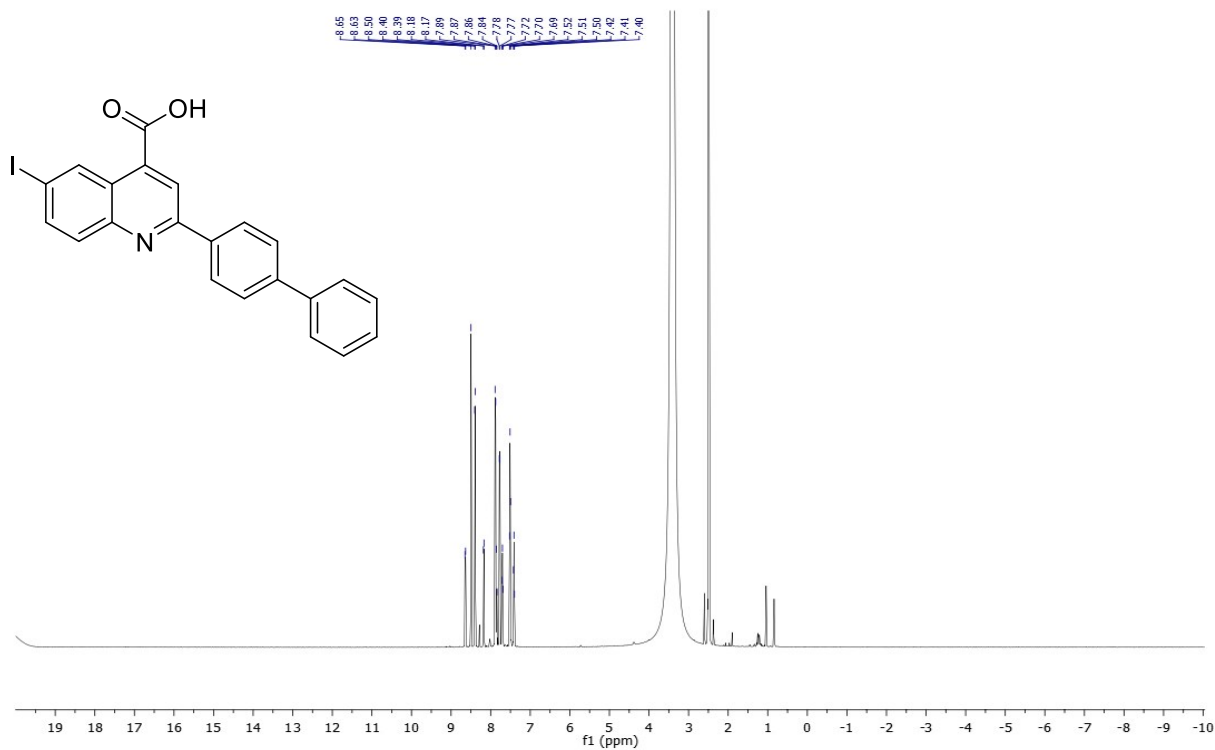

Figure S13. 600 MHz  $^{13}\text{C}$  NMR spectrum of **6g** ( $\text{DMSO-}d_6$ )

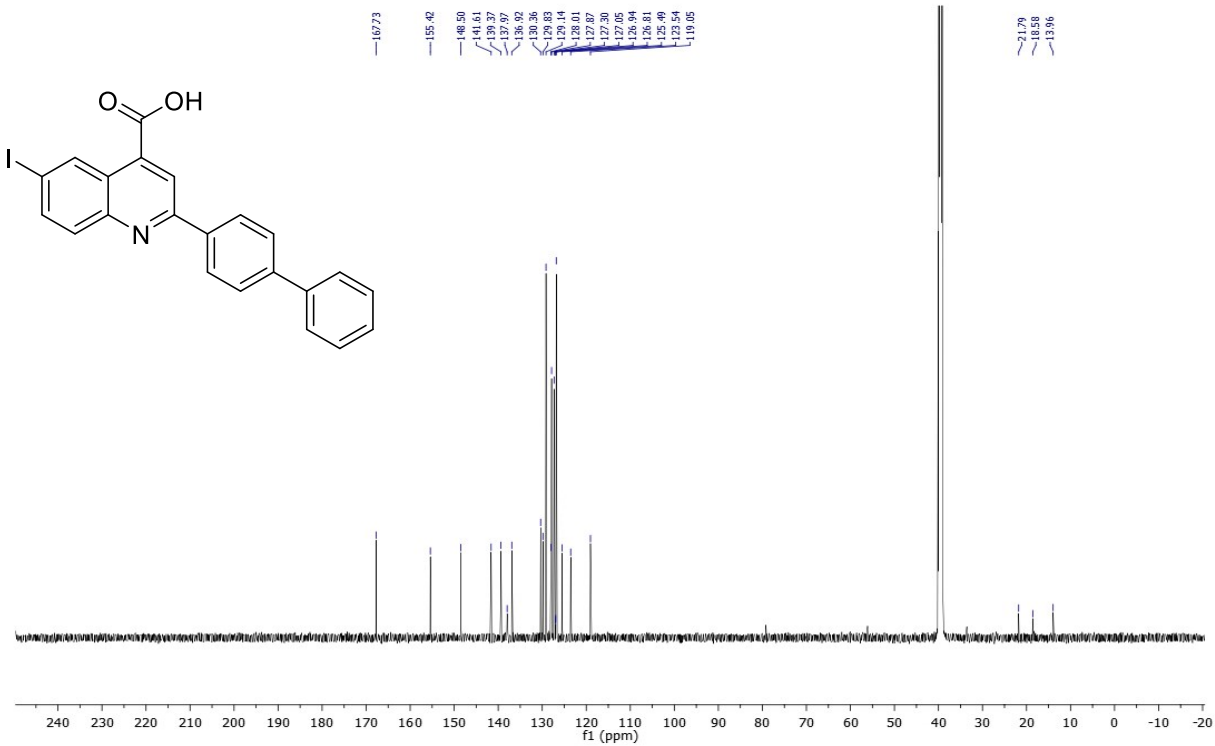

Figure S14. 151 MHz  $^{13}\text{C}$  NMR spectrum of **6g** ( $\text{DMSO-}d_6$ )

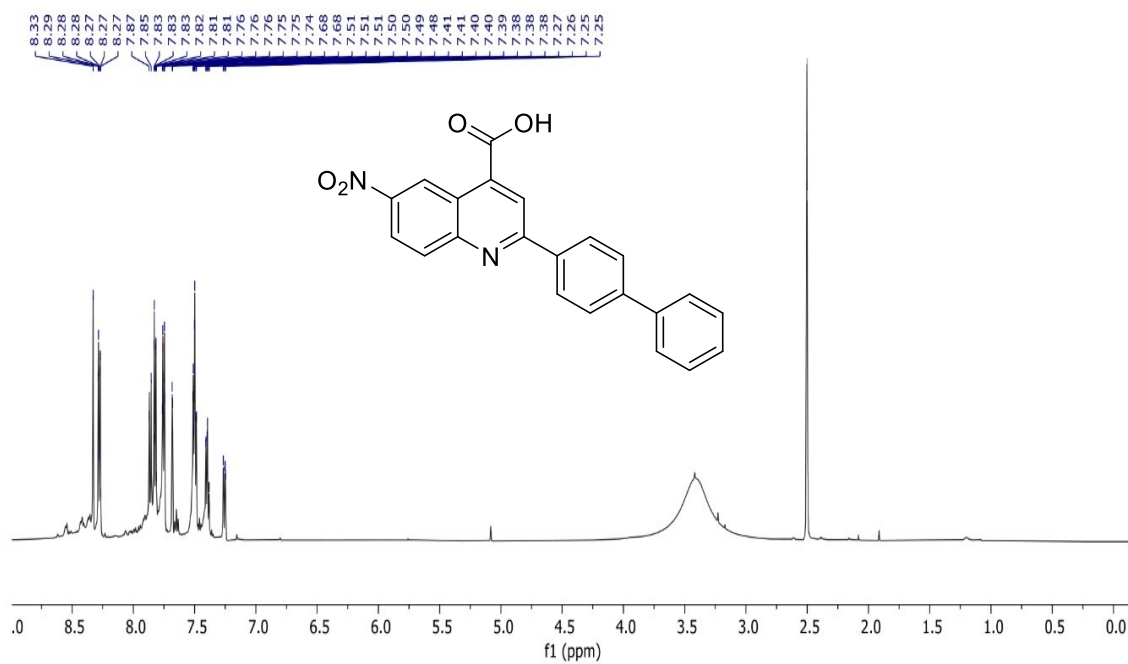

**Figure S15.** 600 MHz <sup>1</sup>H NMR spectrum of **6h** (DMSO-*d*<sub>6</sub>)

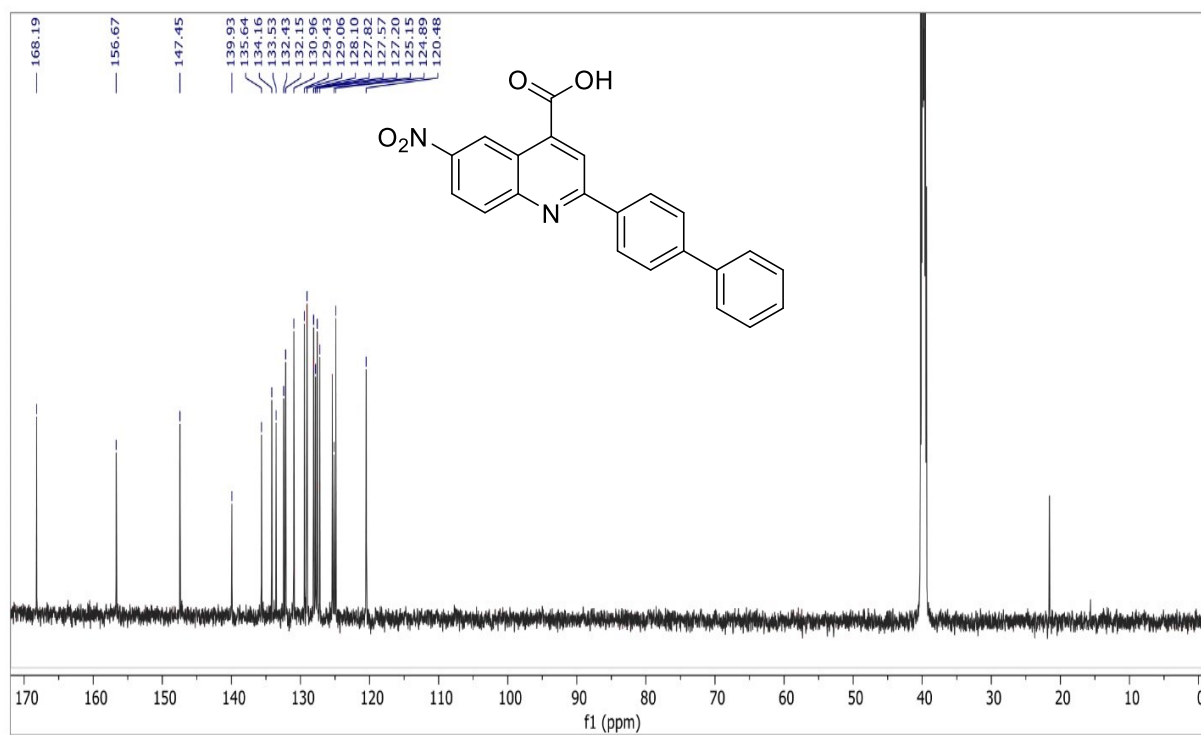

**Figure S16.** 151 MHz <sup>13</sup>C NMR spectrum of **6h** (DMSO-*d*<sub>6</sub>)

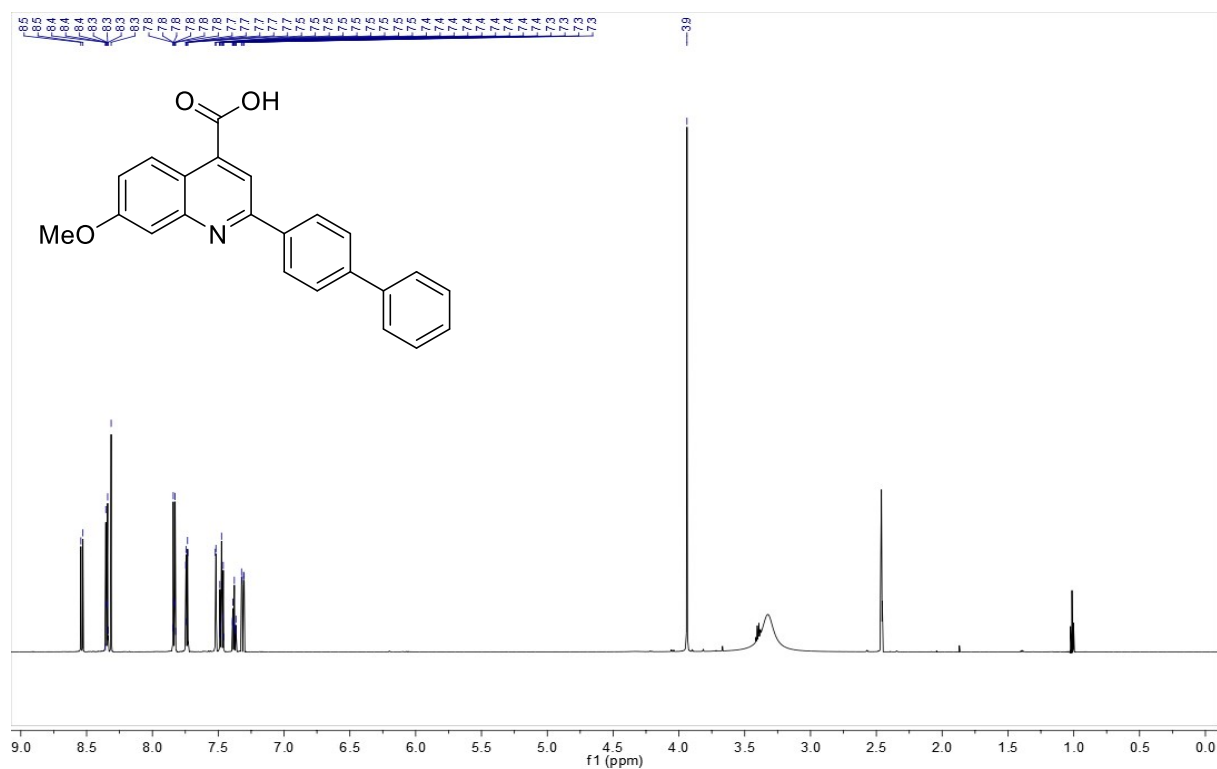

**Figure S17.** 600 MHz <sup>1</sup>H NMR spectrum of **6i** (DMSO-*d*<sub>6</sub>)

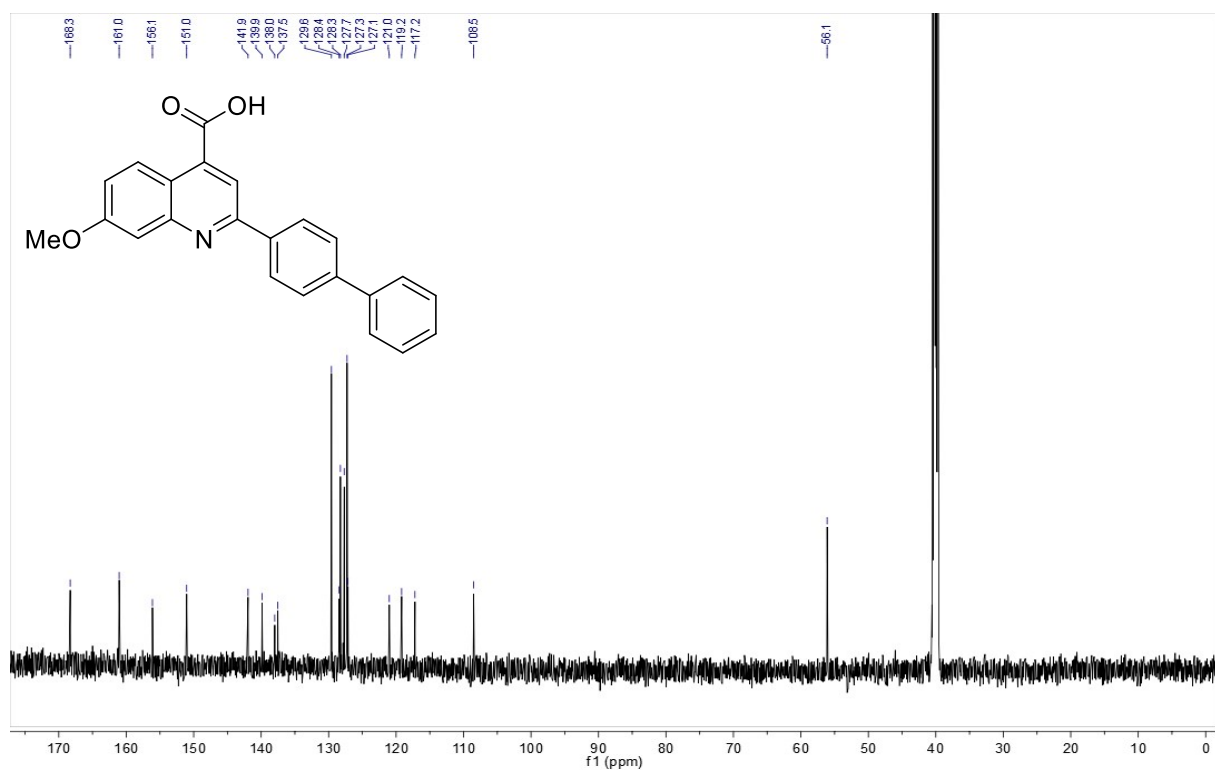

**Figure S18.** 151 MHz <sup>13</sup>C NMR spectrum of **6i** (DMSO-*d*<sub>6</sub>)

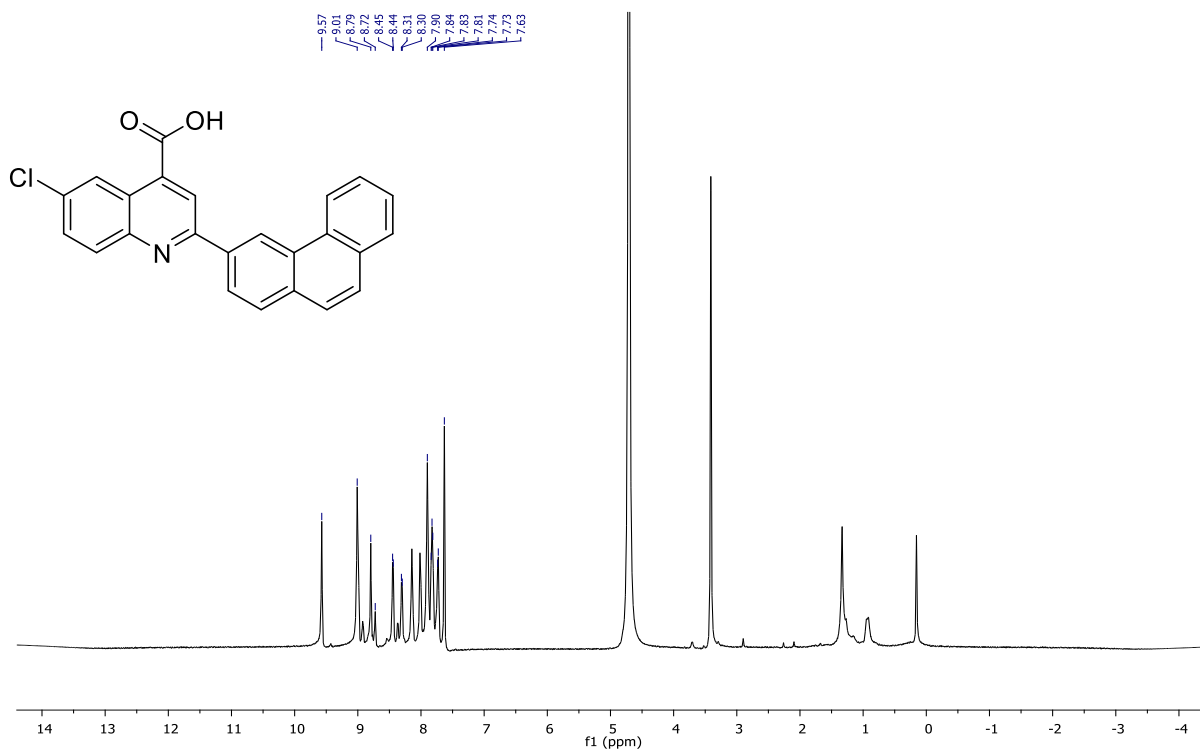

Figure S19. 600 MHz <sup>1</sup>H NMR spectrum of **6j** (DMSO-*d*<sub>6</sub>)

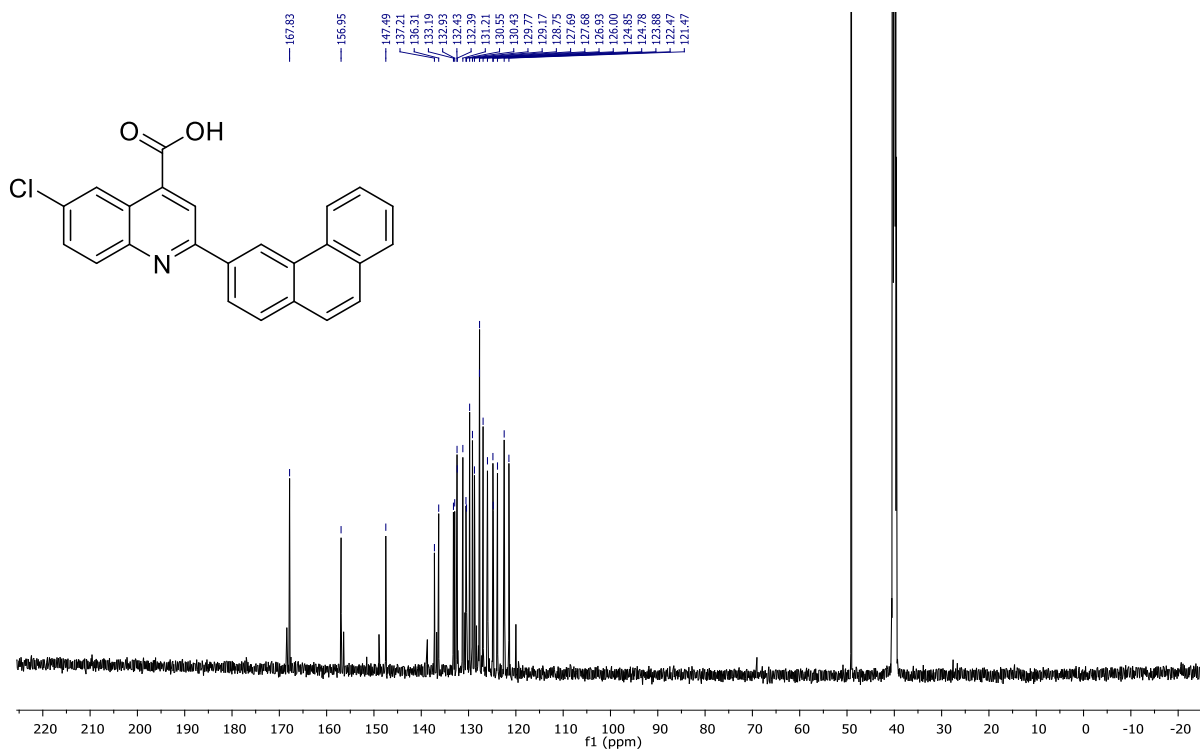

Figure S20. 151 MHz <sup>13</sup>C NMR spectrum of **6j** (DMSO-*d*<sub>6</sub>)

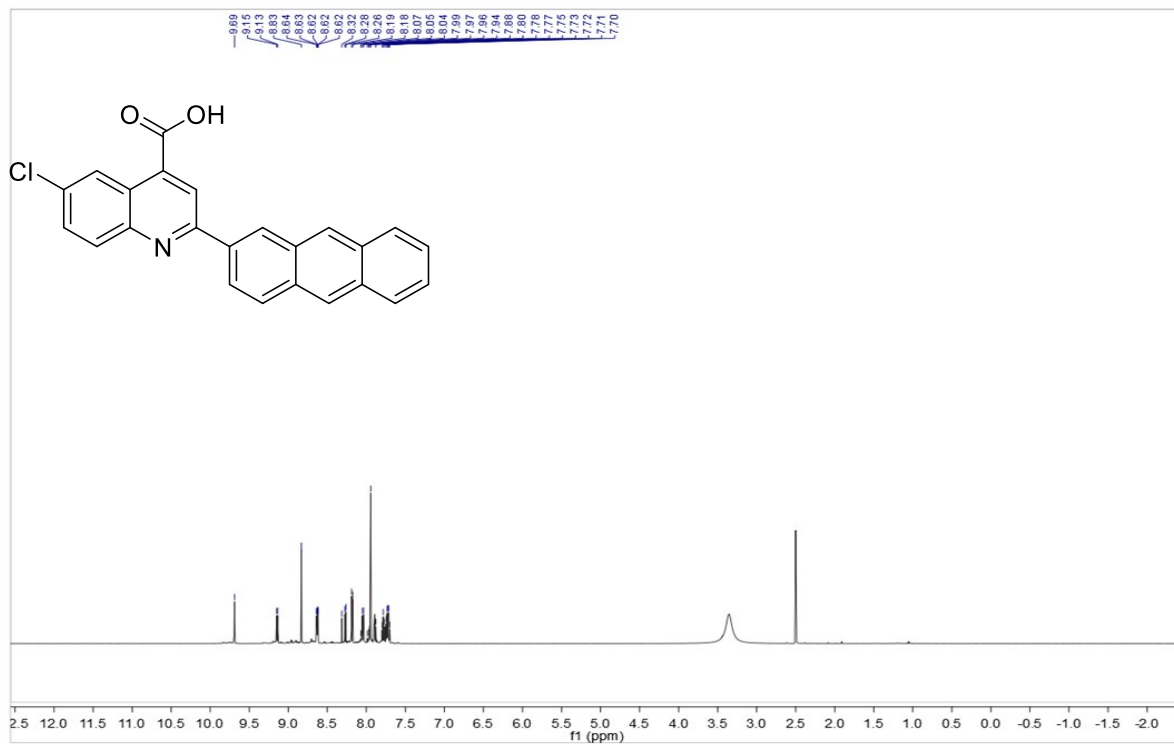

**Figure S21.** 600 MHz <sup>1</sup>H NMR spectrum of **6k** (DMSO-*d*<sub>6</sub>)

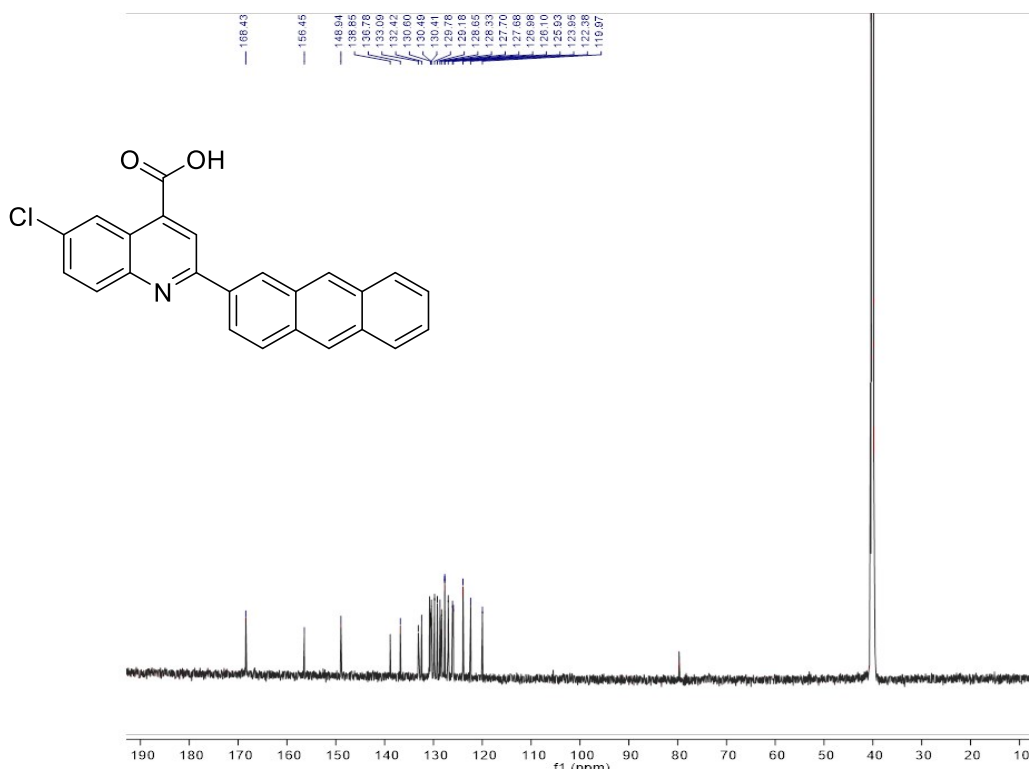

**Figure S22.** 151 MHz <sup>13</sup>C NMR spectrum of **6k** (DMSO-*d*<sub>6</sub>)

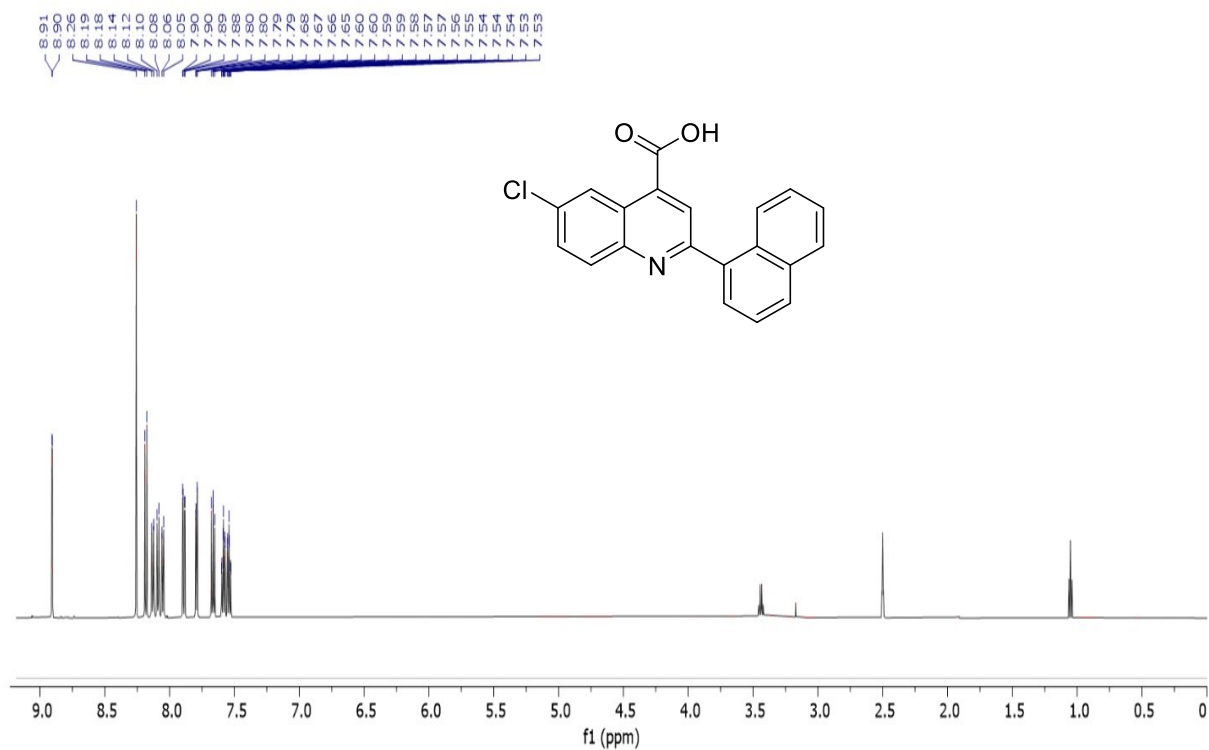

**Figure S23.** 600 MHz <sup>1</sup>H NMR spectrum of **6l** (DMSO-*d*<sub>6</sub>)

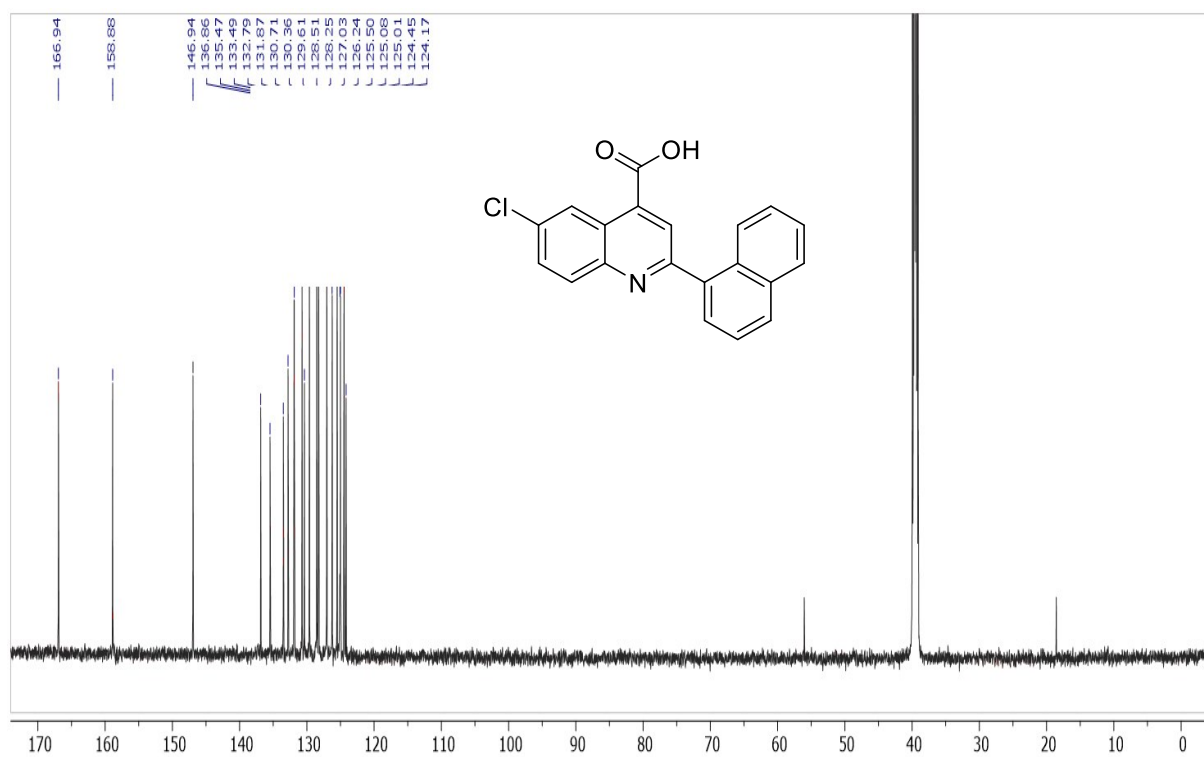

**Figure S24.** 151 MHz <sup>13</sup>C NMR spectrum of **6l** (DMSO-*d*<sub>6</sub>)

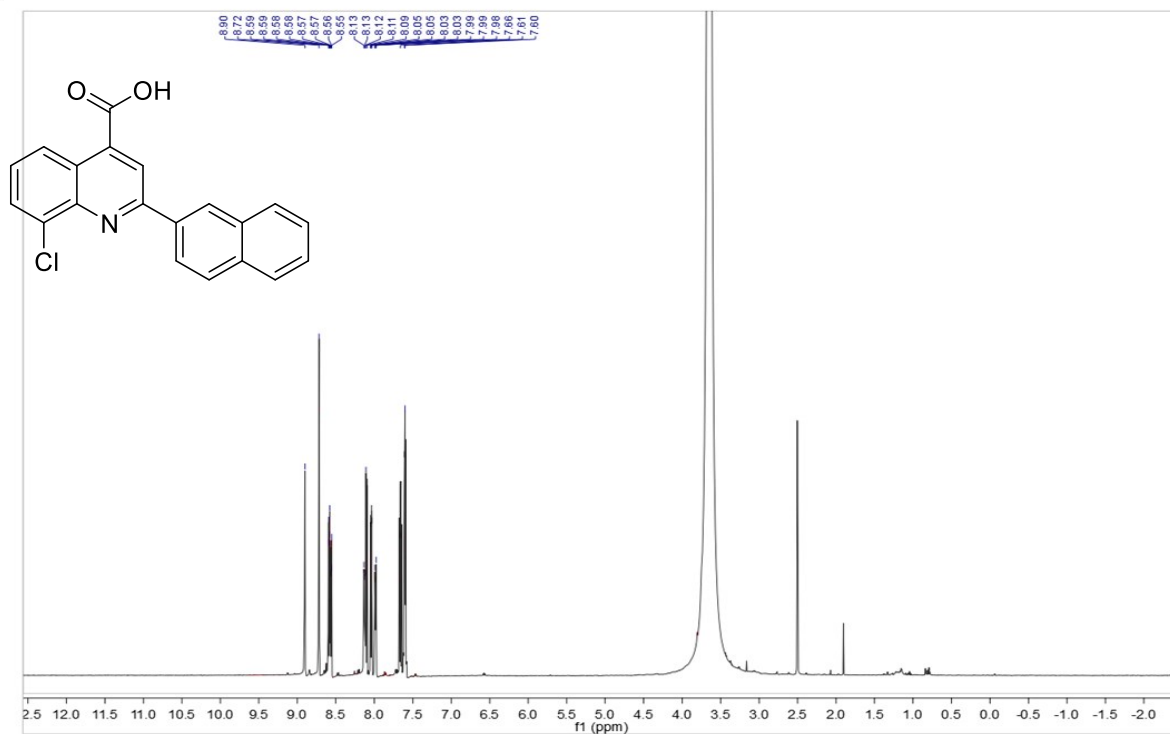

**Figure S25.** 600 MHz  $^1\text{H}$  NMR spectrum of **6n** ( $\text{DMSO-}d_6$ )

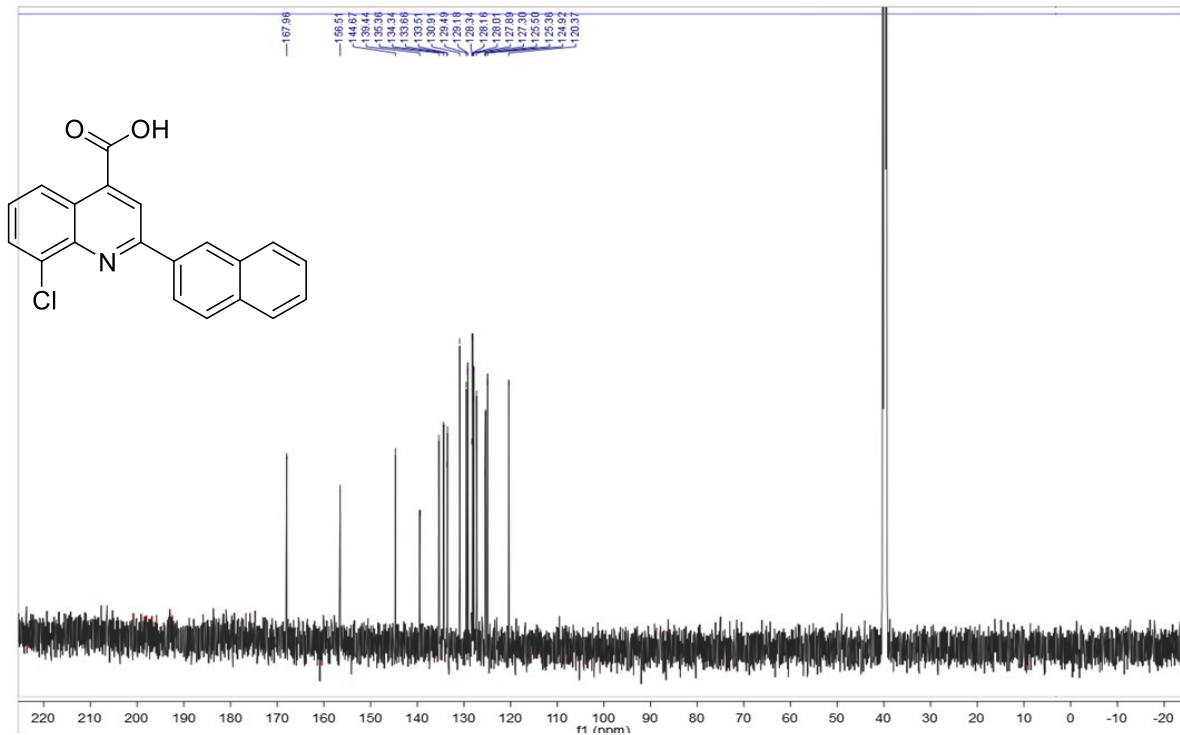

**Figure S26.** 151 MHz  $^{13}\text{C}$  NMR spectrum of **6n** ( $\text{DMSO-}d_6$ )



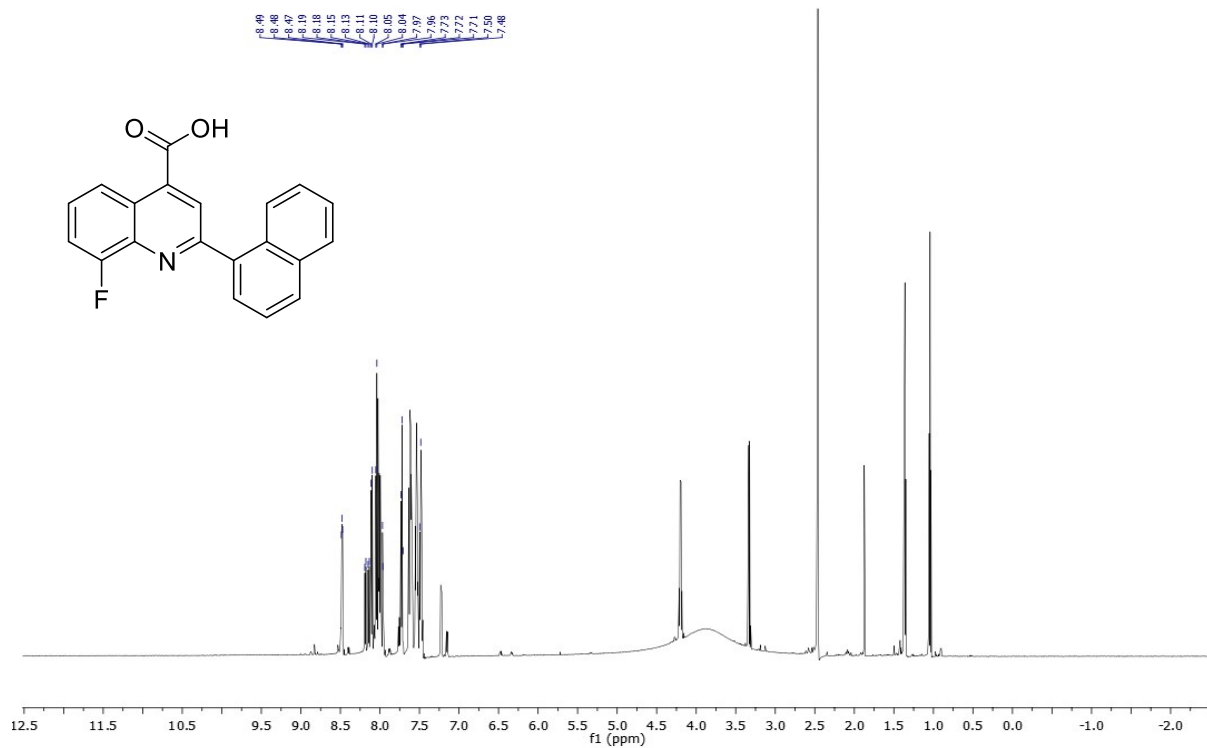

Figure S27. 600 MHz <sup>1</sup>H NMR spectrum of **6p** (DMSO-d<sub>6</sub>)

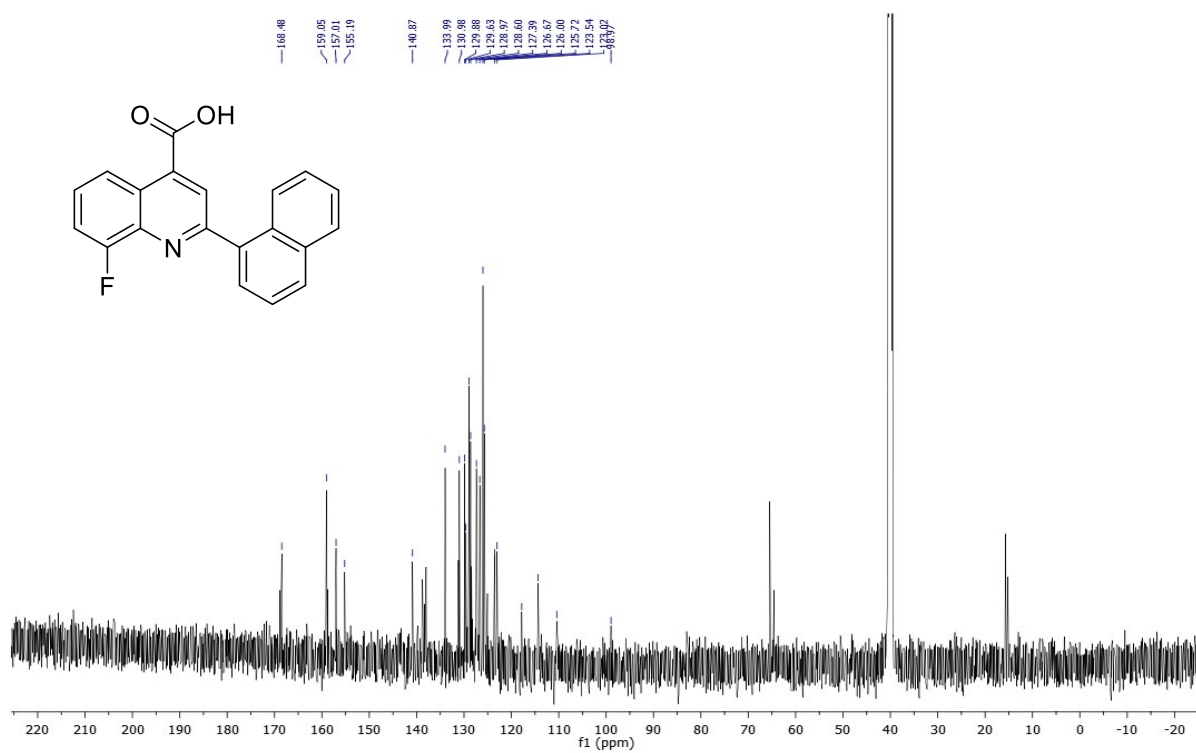

Figure S28. 151 MHz <sup>13</sup>C NMR spectrum of **6p** (DMSO-d<sub>6</sub>)

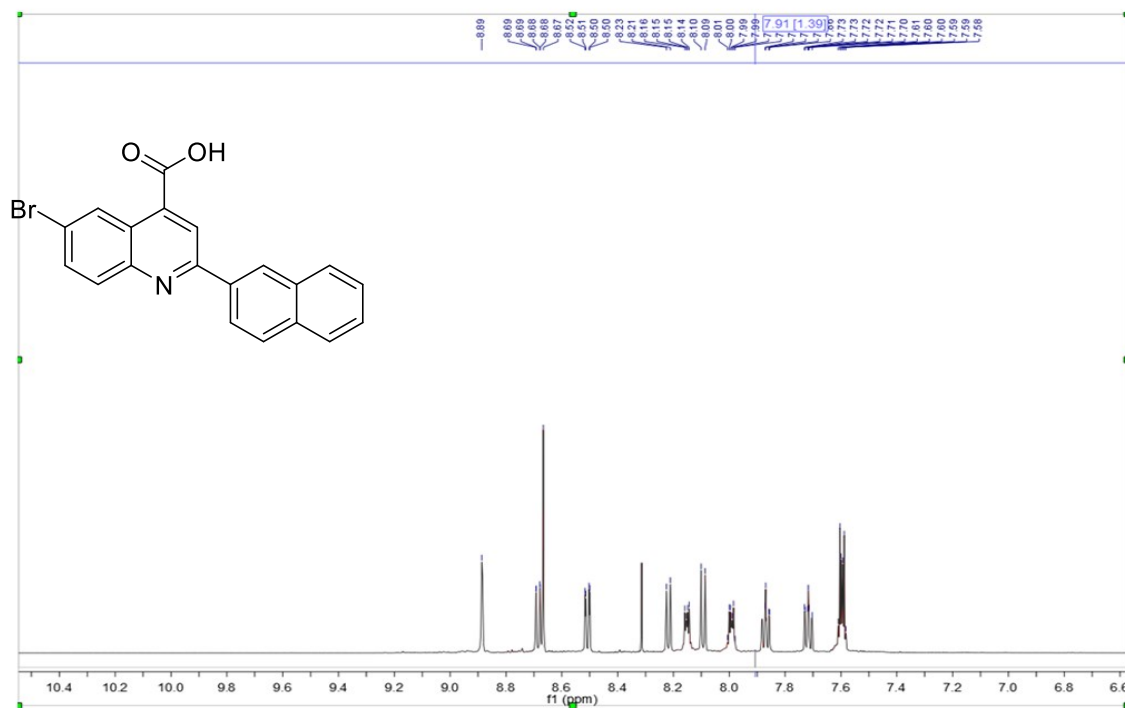

**Figure S29.** 600 MHz <sup>1</sup>H NMR spectrum of **6q** (DMSO-*d*<sub>6</sub>)

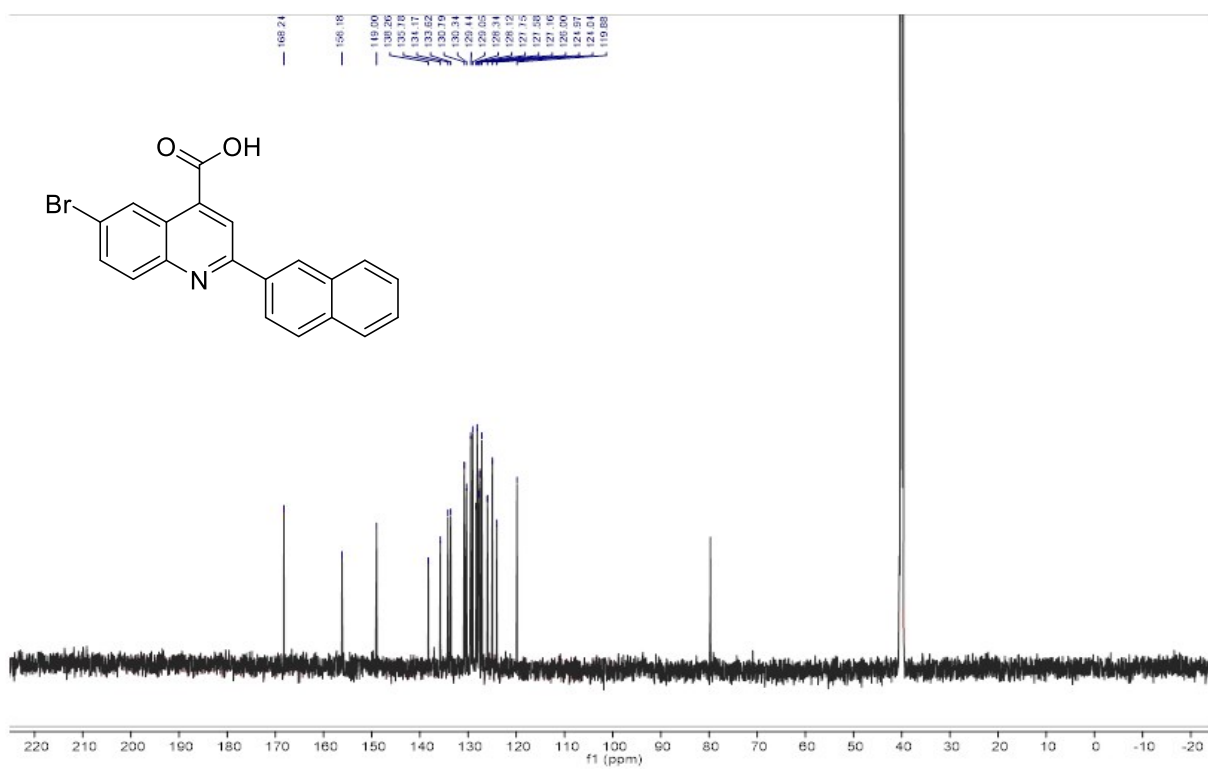

**Figure S30.** 151 MHz <sup>13</sup>C NMR spectrum of **6q** (DMSO-*d*<sub>6</sub>)

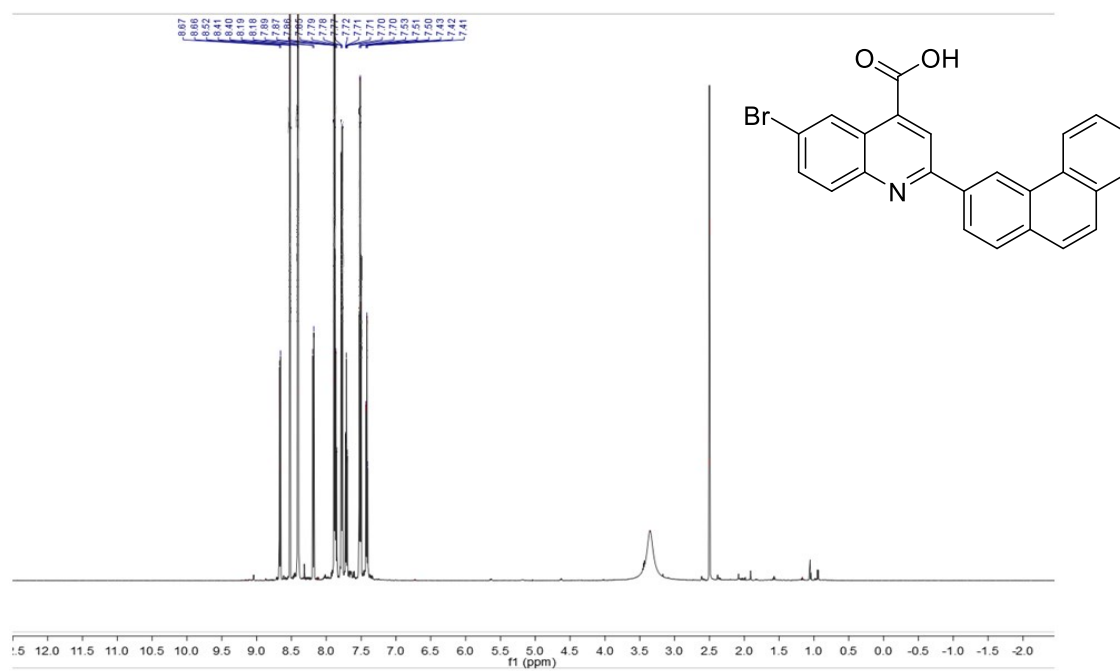

**S31.** 600 MHz <sup>1</sup>H NMR spectrum of **6r** (DMSO-*d*<sub>6</sub>)

**Figure**

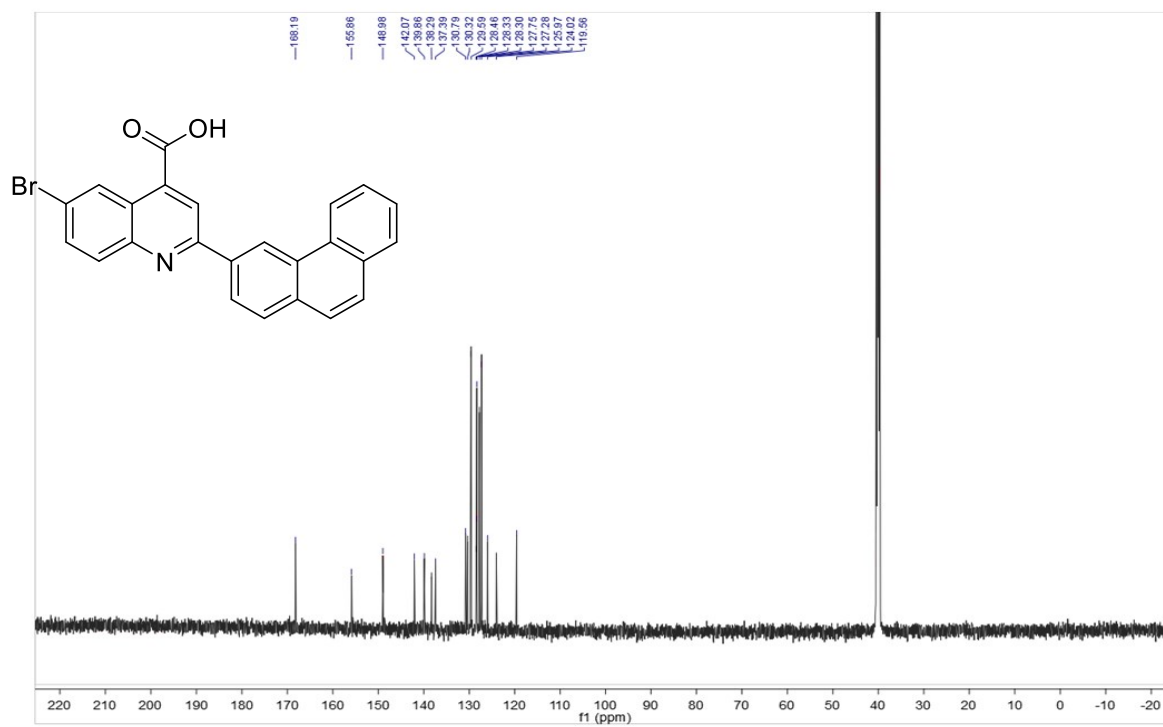

**Figure S32.** 151 MHz <sup>13</sup>C NMR spectrum of **6r** (DMSO-*d*<sub>6</sub>)

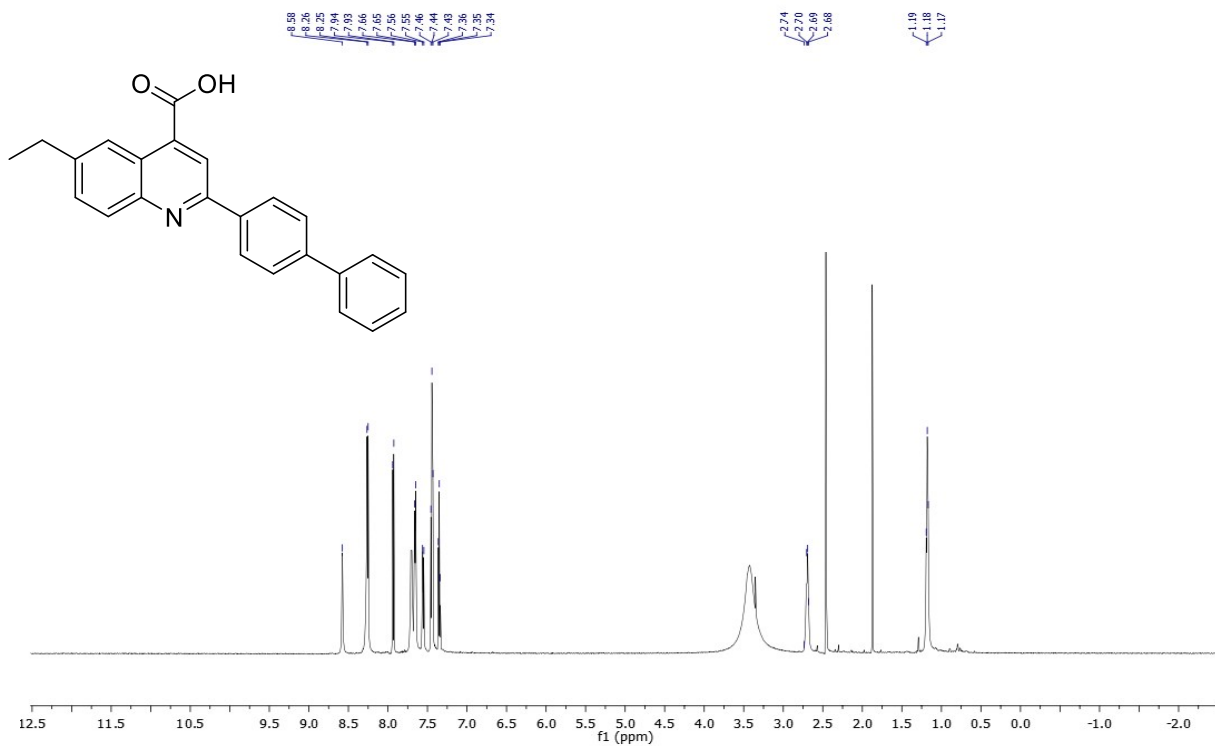

**Figure S33.** 600 MHz <sup>1</sup>H NMR spectrum of **7b** (DMSO-*d*<sub>6</sub>)

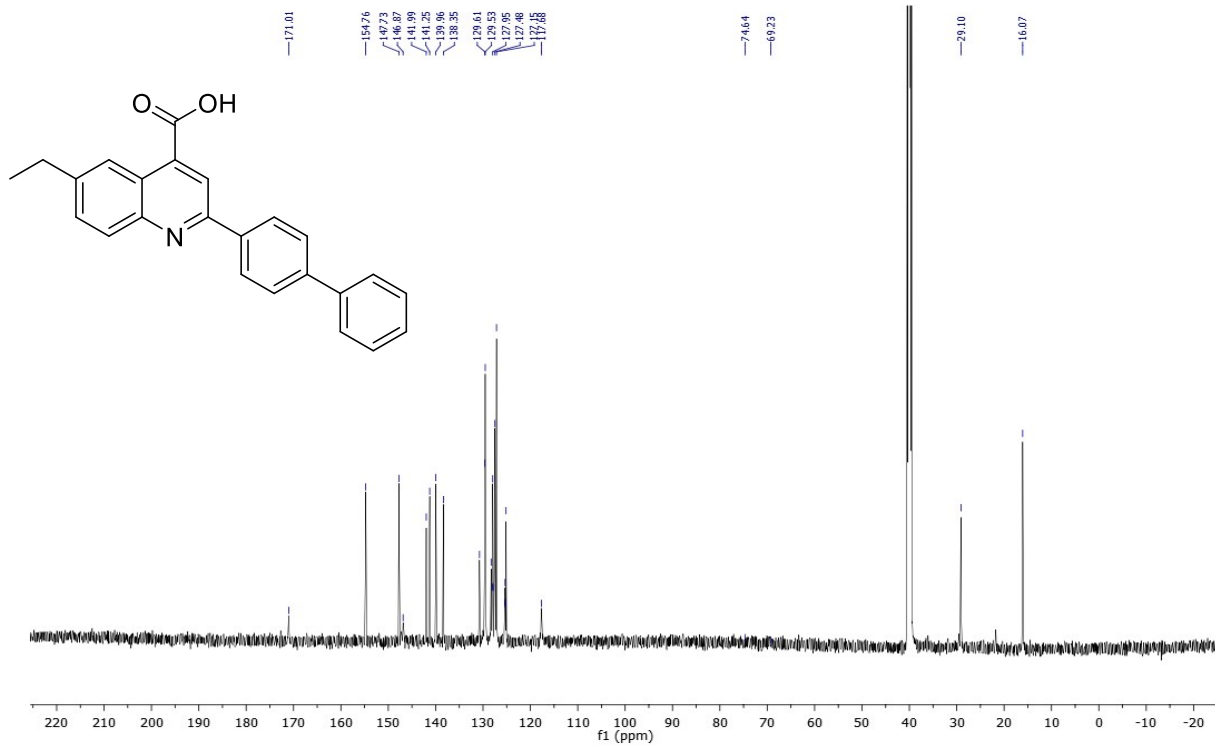

**Figure S34.** 151 MHz <sup>13</sup>C NMR spectrum of **7b** (DMSO-*d*<sub>6</sub>)

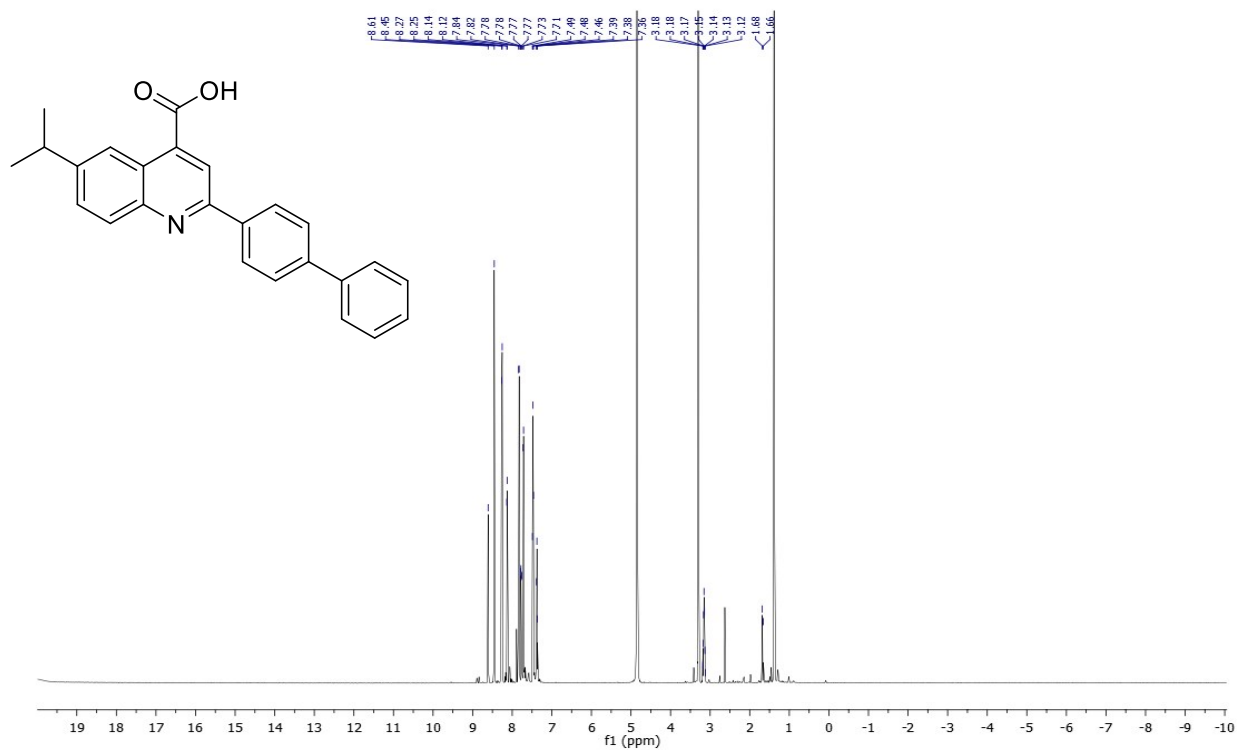

Figure S35. 600 MHz <sup>1</sup>H NMR spectrum of **7c** (MeOH-*d*<sub>4</sub>)

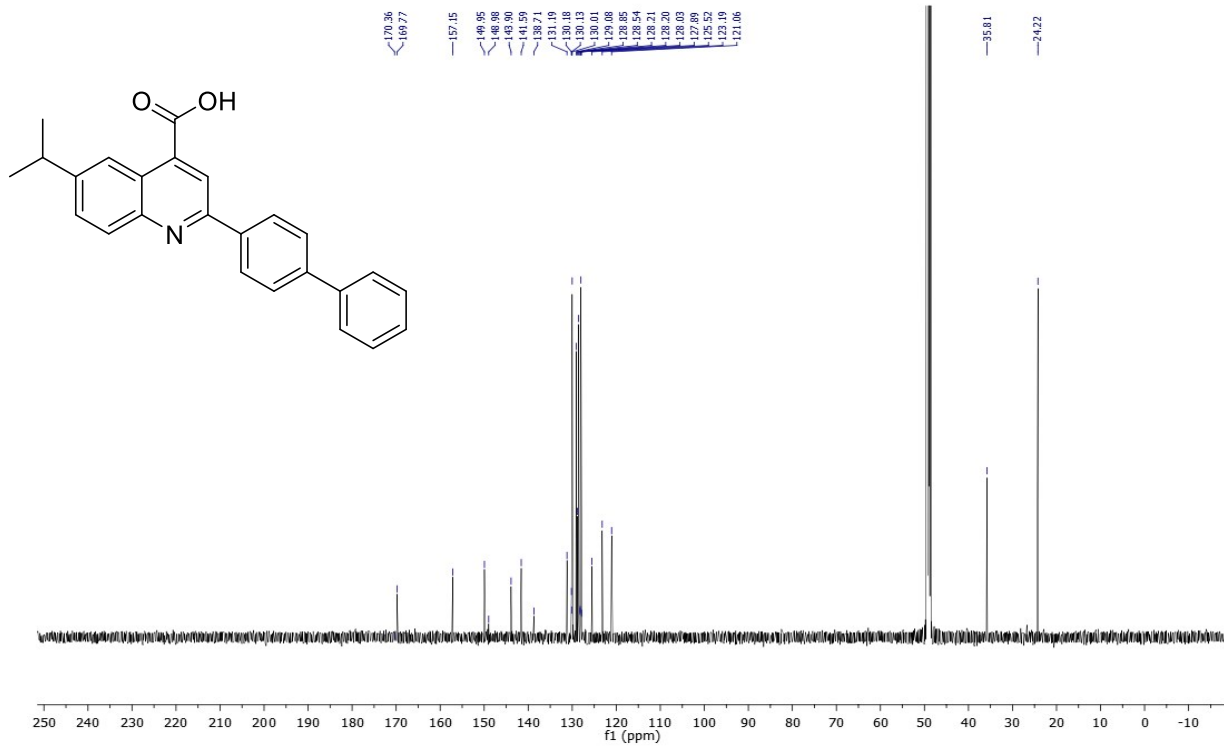

Figure S36. 151 MHz <sup>13</sup>C NMR spectrum of **7c** (MeOH-*d*<sub>4</sub>)

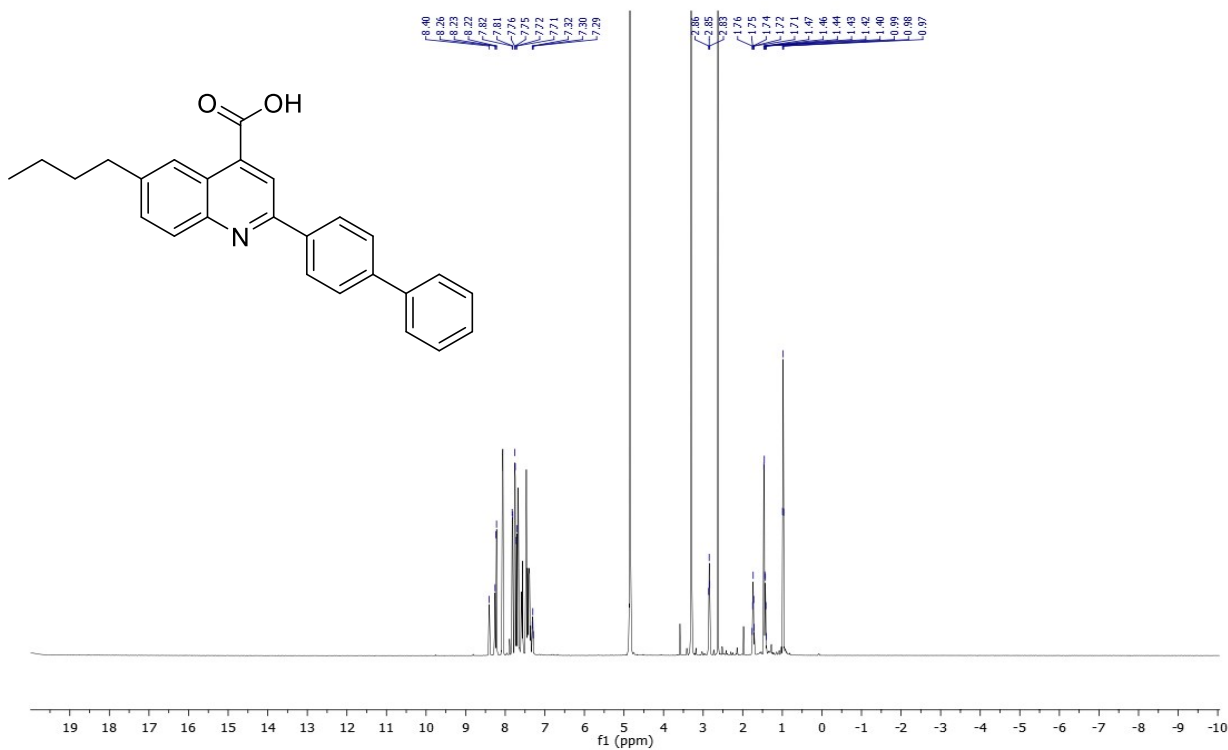

**Figure S37.** 600 MHz <sup>1</sup>H NMR spectrum of **7d** (MeOH-*d*<sub>4</sub>)

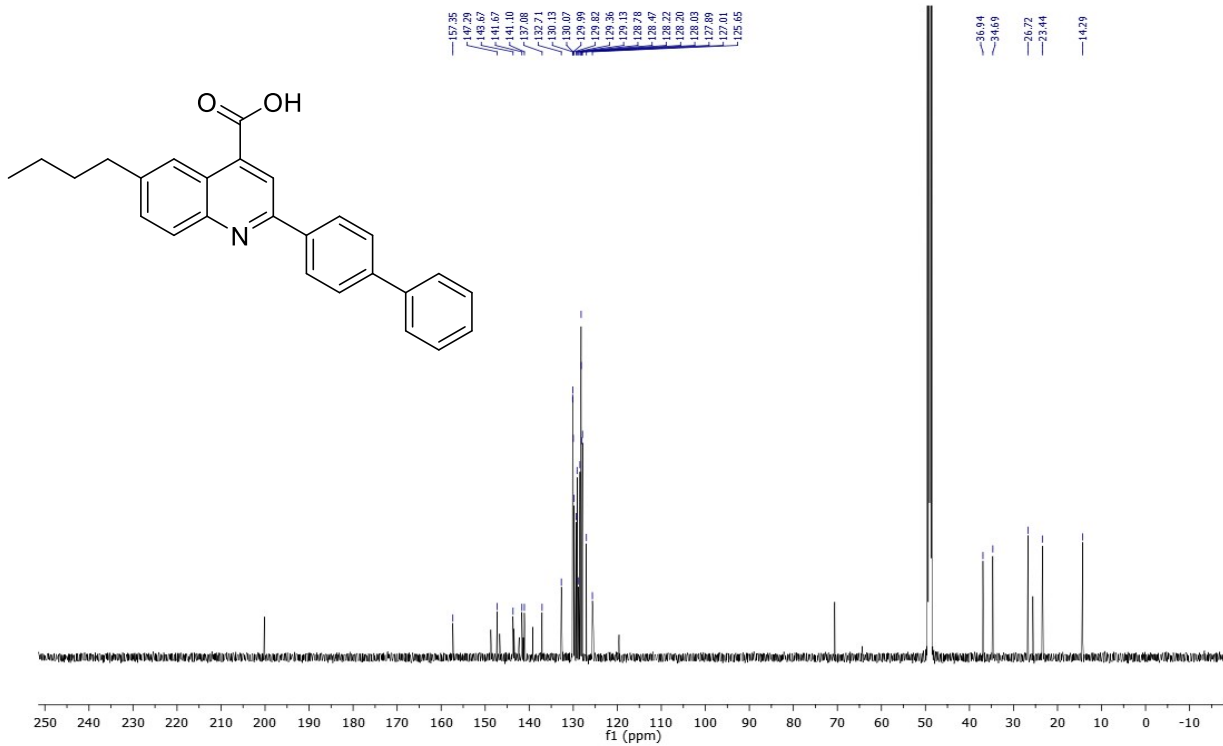

**Figure S38.** 151 MHz <sup>13</sup>C NMR spectrum of **7d** (MeOH-*d*<sub>4</sub>)

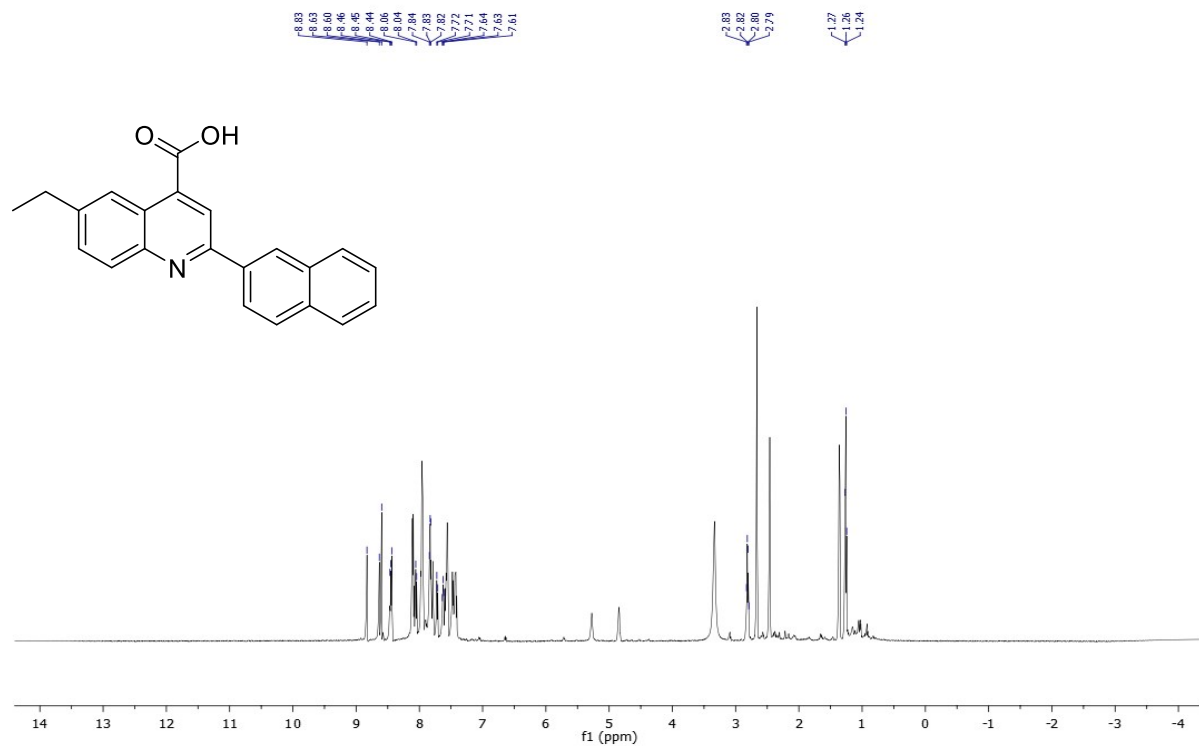

**Figure S39.** 600 MHz <sup>1</sup>H NMR spectrum of **7g** (DMSO-*d*<sub>6</sub>)

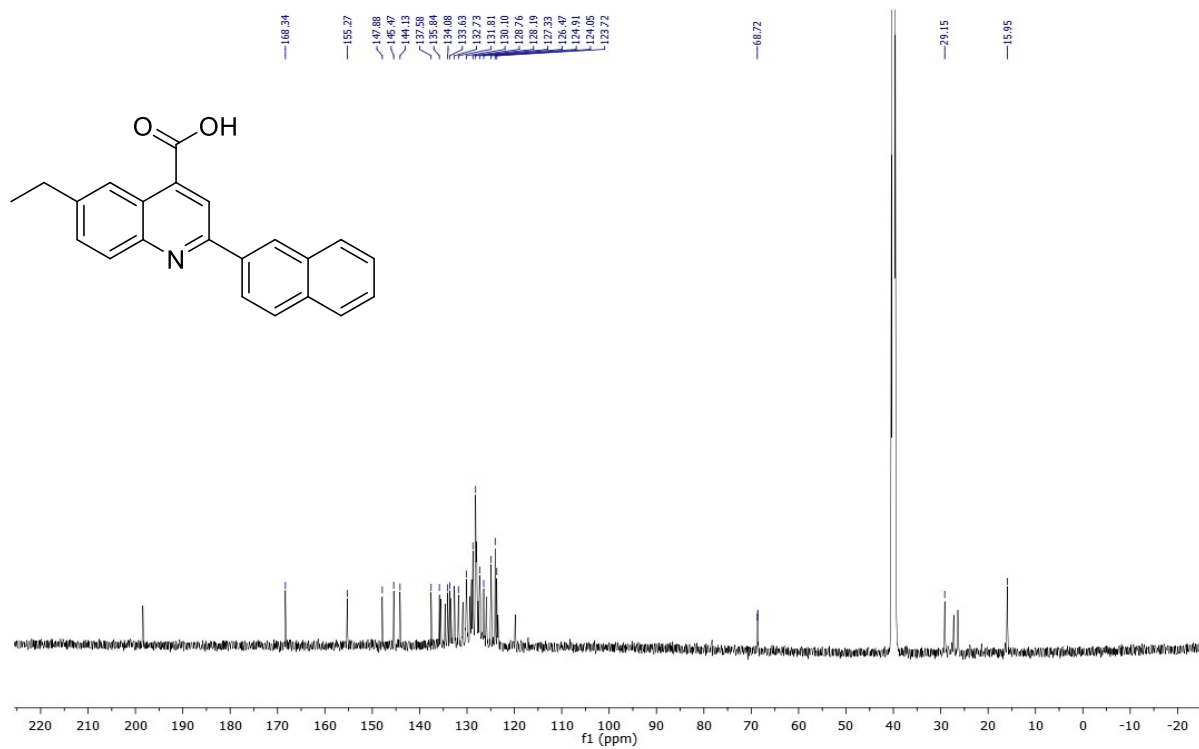

**Figure S40.** 151 MHz <sup>13</sup>C NMR spectrum of **7g** (DMSO-*d*<sub>6</sub>)

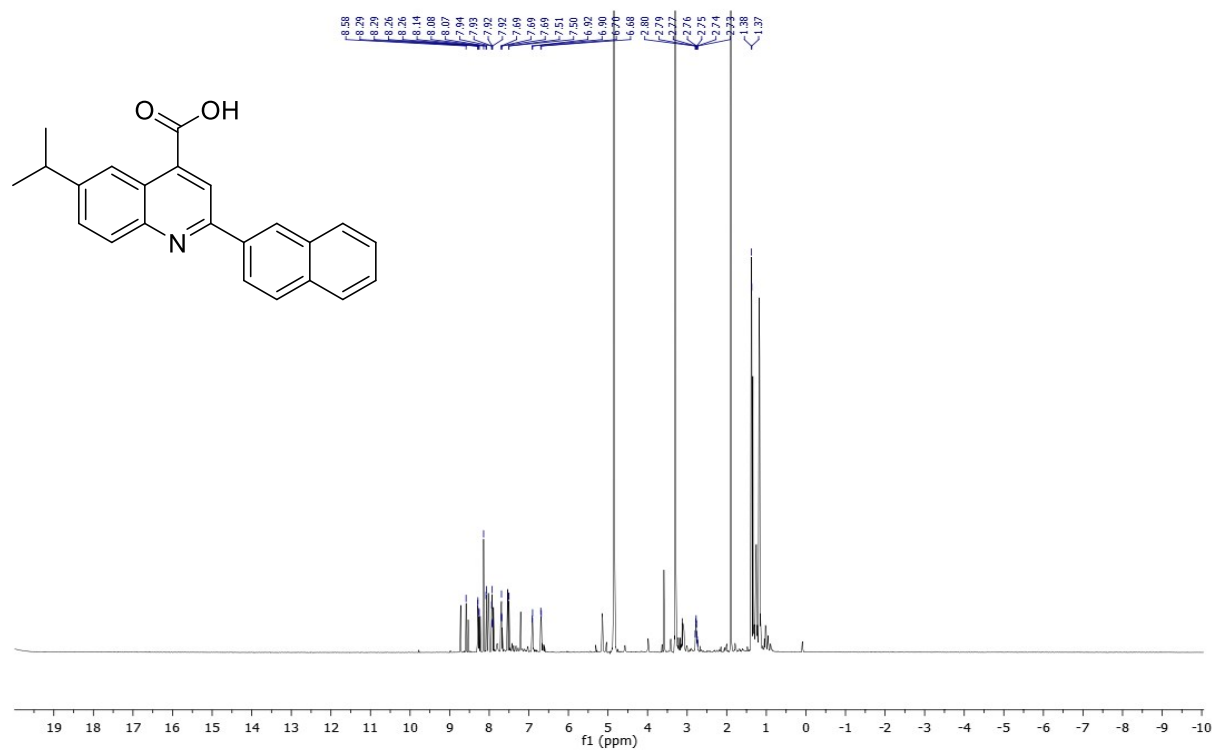

**Figure S41.** 600 MHz <sup>1</sup>H NMR spectrum of **7h** (MeOH-*d*<sub>4</sub>)

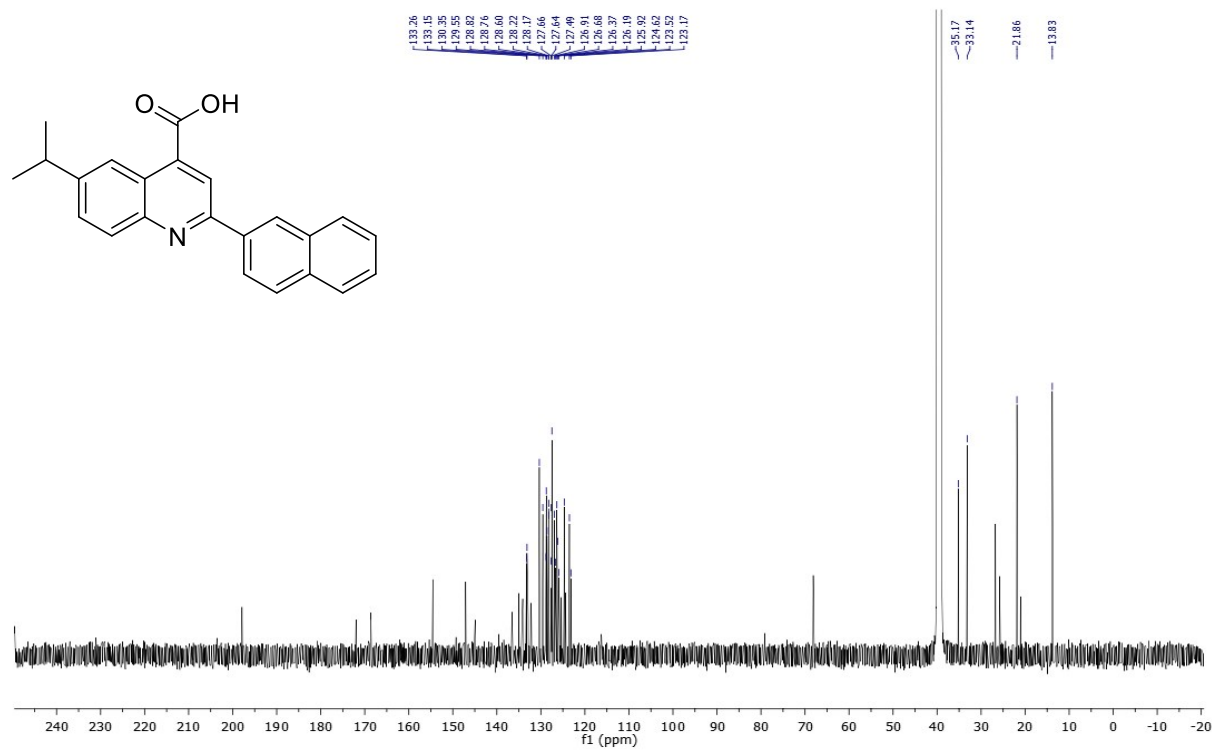

**Figure S42.** 151 MHz <sup>13</sup>C NMR spectrum of **7h** (MeOH-*d*<sub>4</sub>)



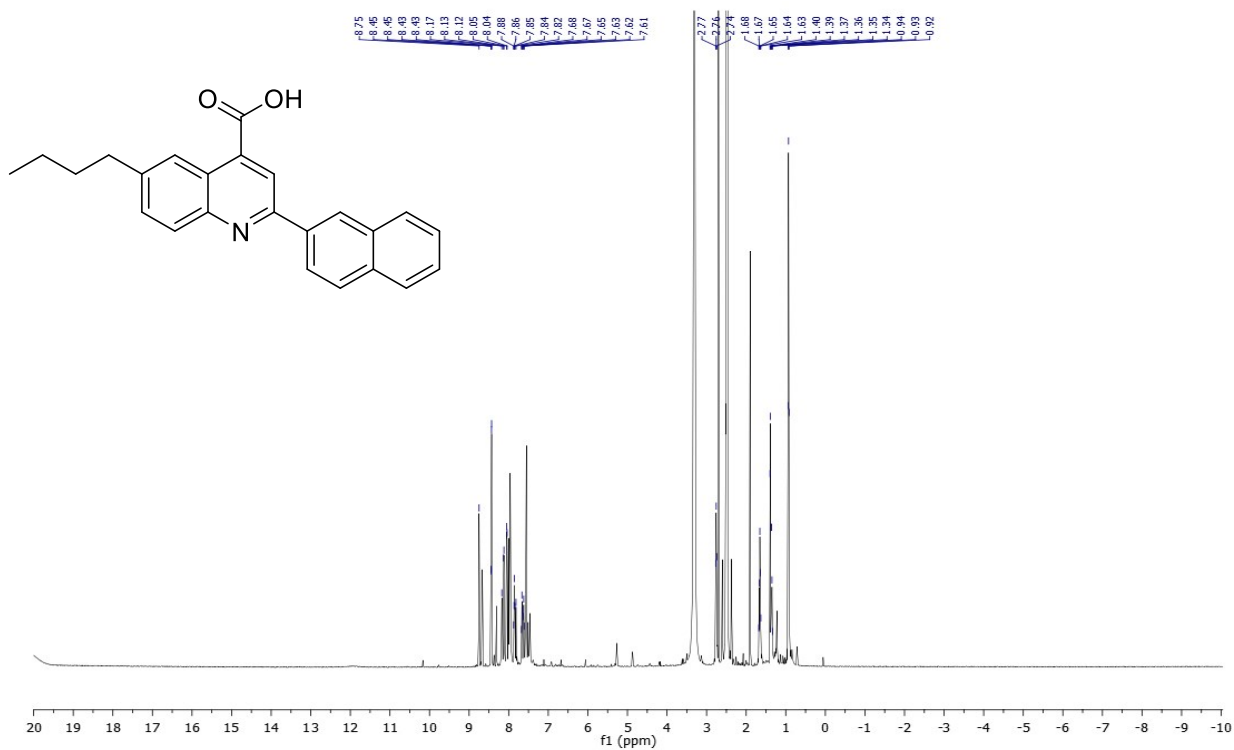

**Figure S43.** 600 MHz <sup>1</sup>H NMR spectrum of **7i** (DMSO-*d*<sub>6</sub>)

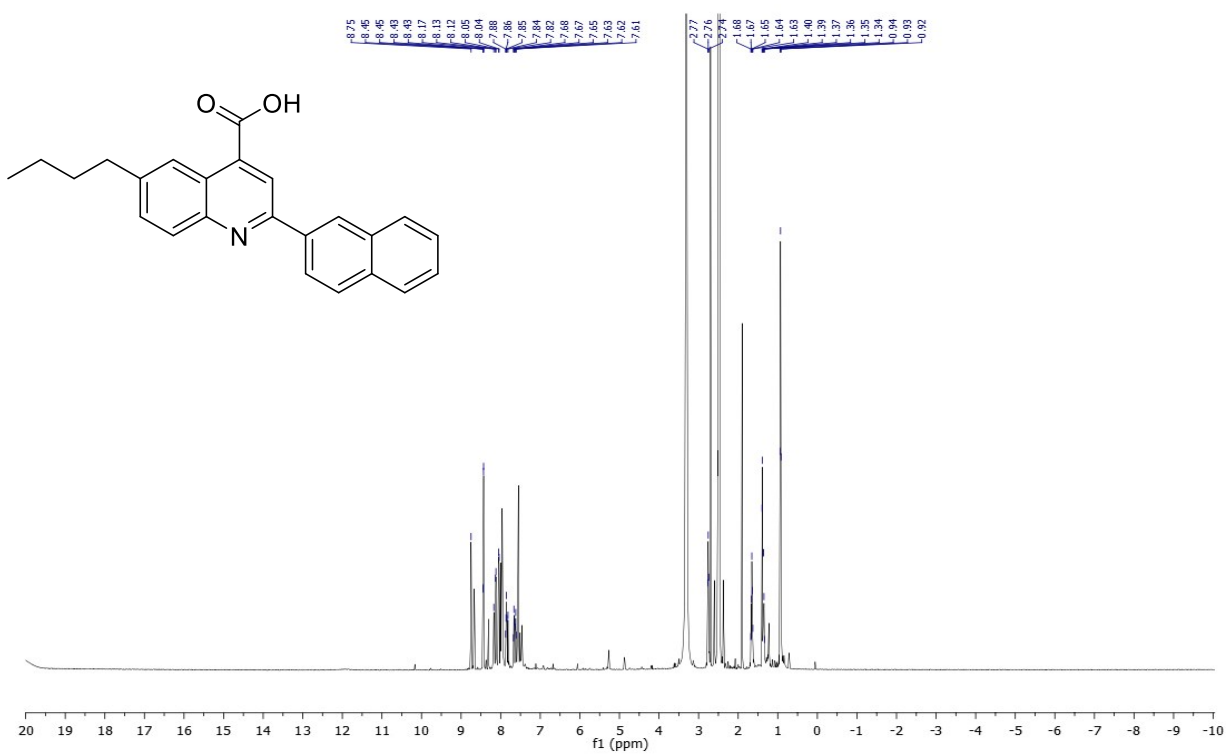

**Figure S44.** 151 MHz <sup>13</sup>C NMR spectrum of **7i** (DMSO-*d*<sub>6</sub>)

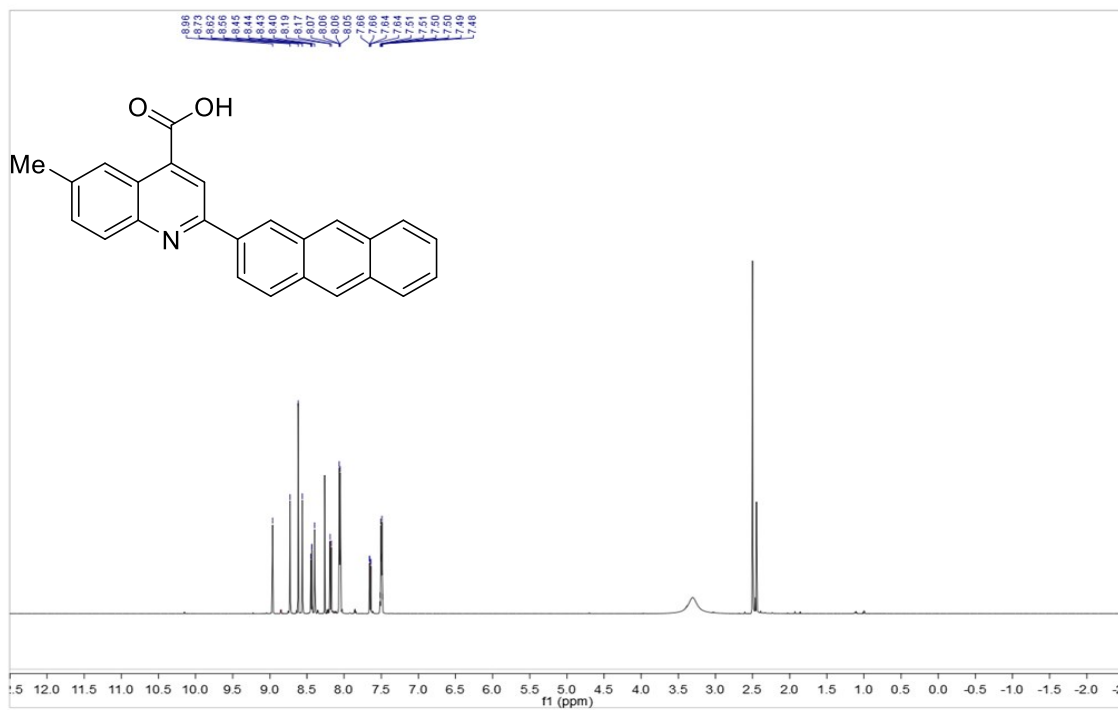

**Figure S45.** 600 MHz <sup>1</sup>H NMR spectrum of **7j** (DMSO-*d*<sub>6</sub>)

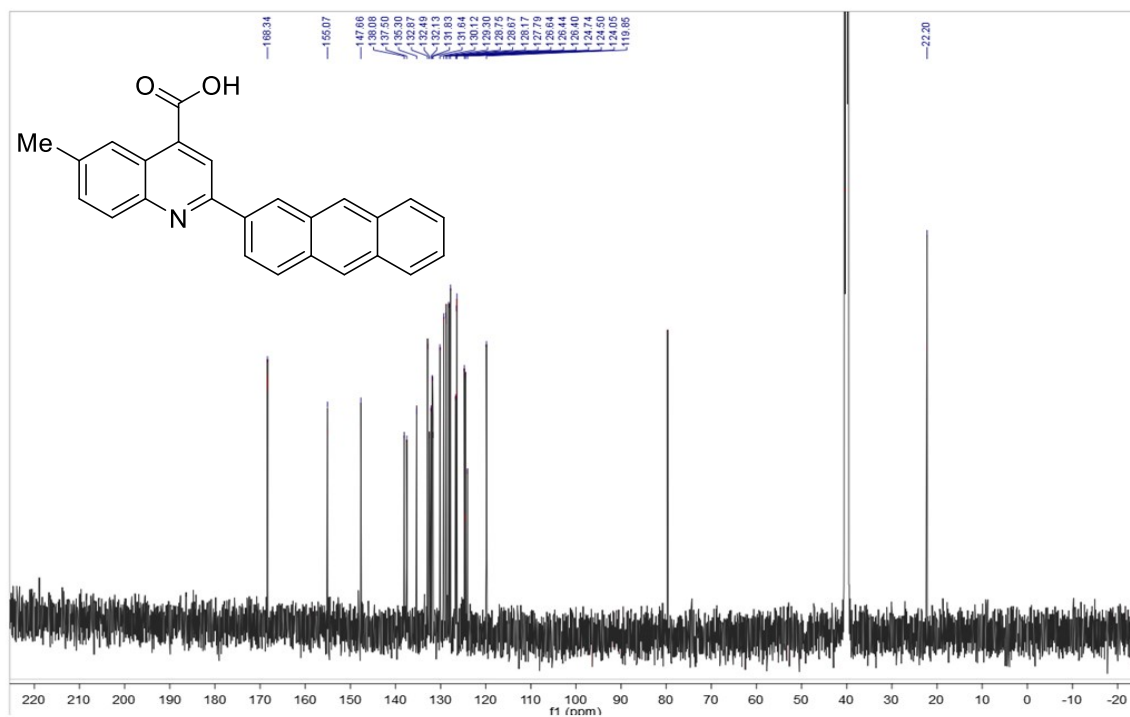

**Figure S46.** 151 MHz <sup>13</sup>C NMR spectrum of **7j** (DMSO-*d*<sub>6</sub>)

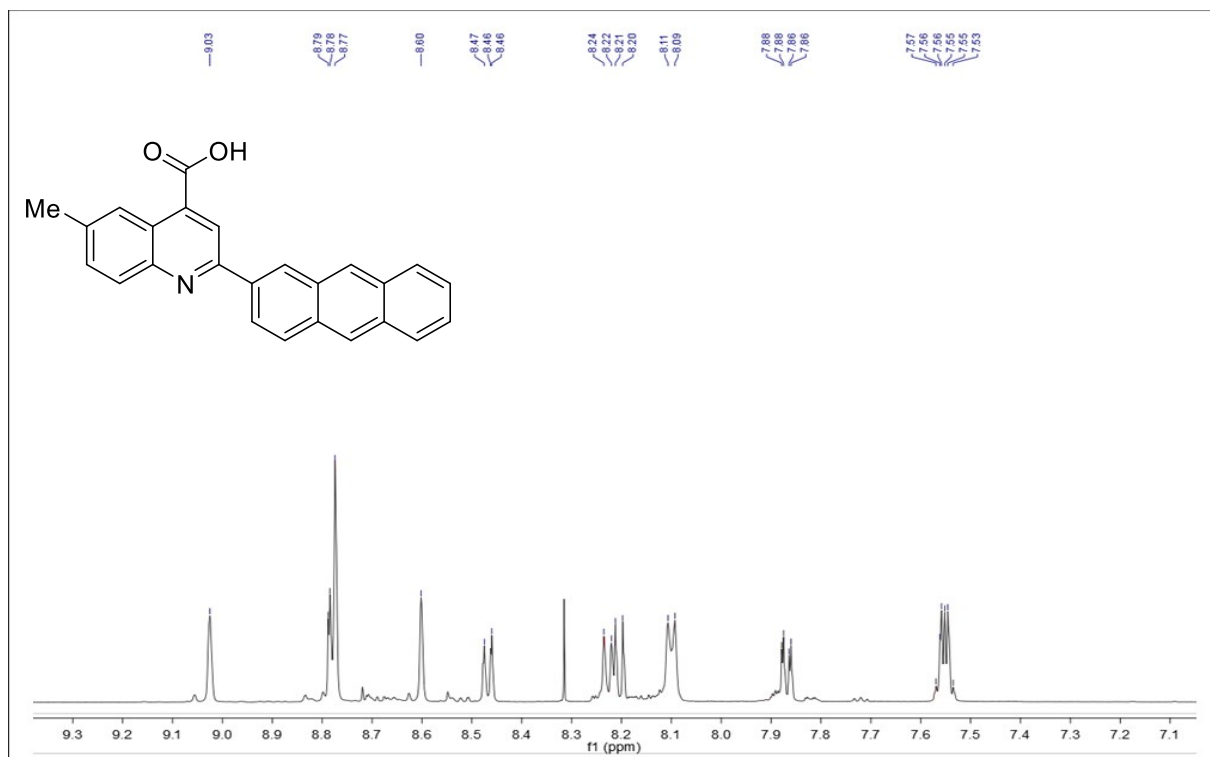

Figure S47. 600 MHz <sup>1</sup>H NMR spectrum of 7k (DMSO-*d*<sub>6</sub>)

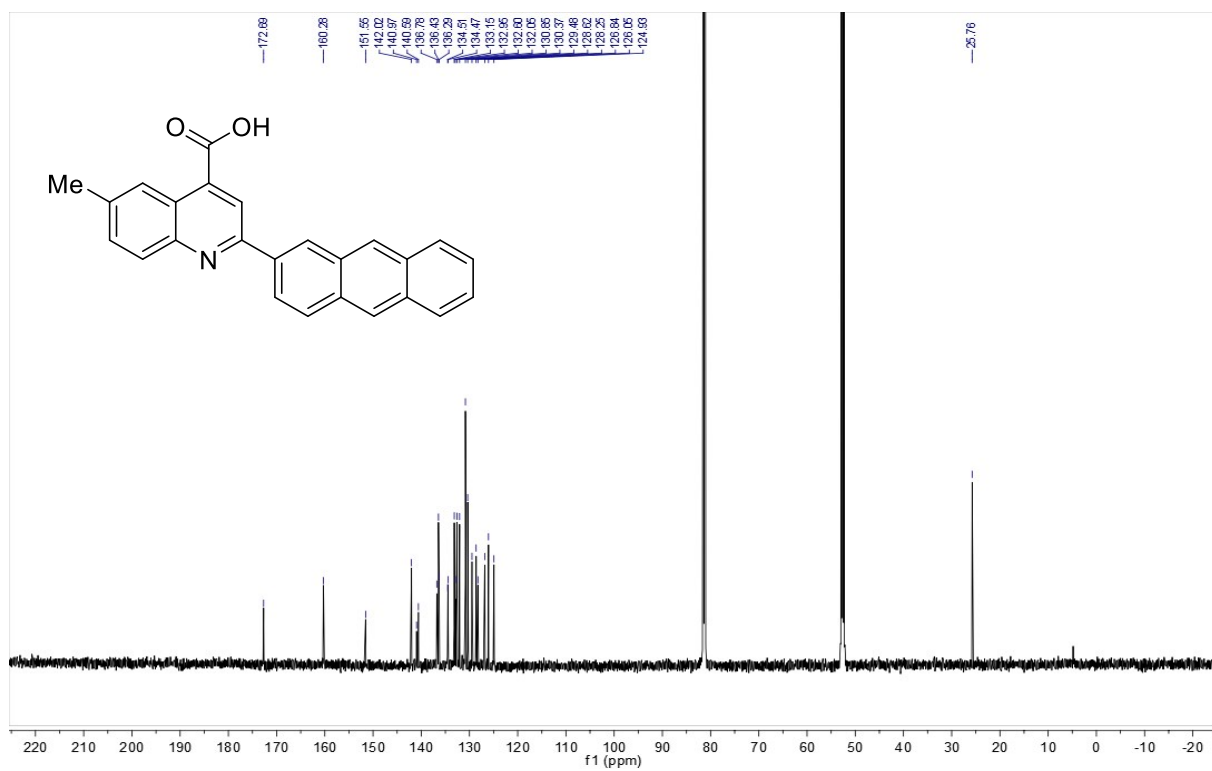

Figure S48. 151 MHz <sup>13</sup>C NMR spectrum of 7k (DMSO-*d*<sub>6</sub>)

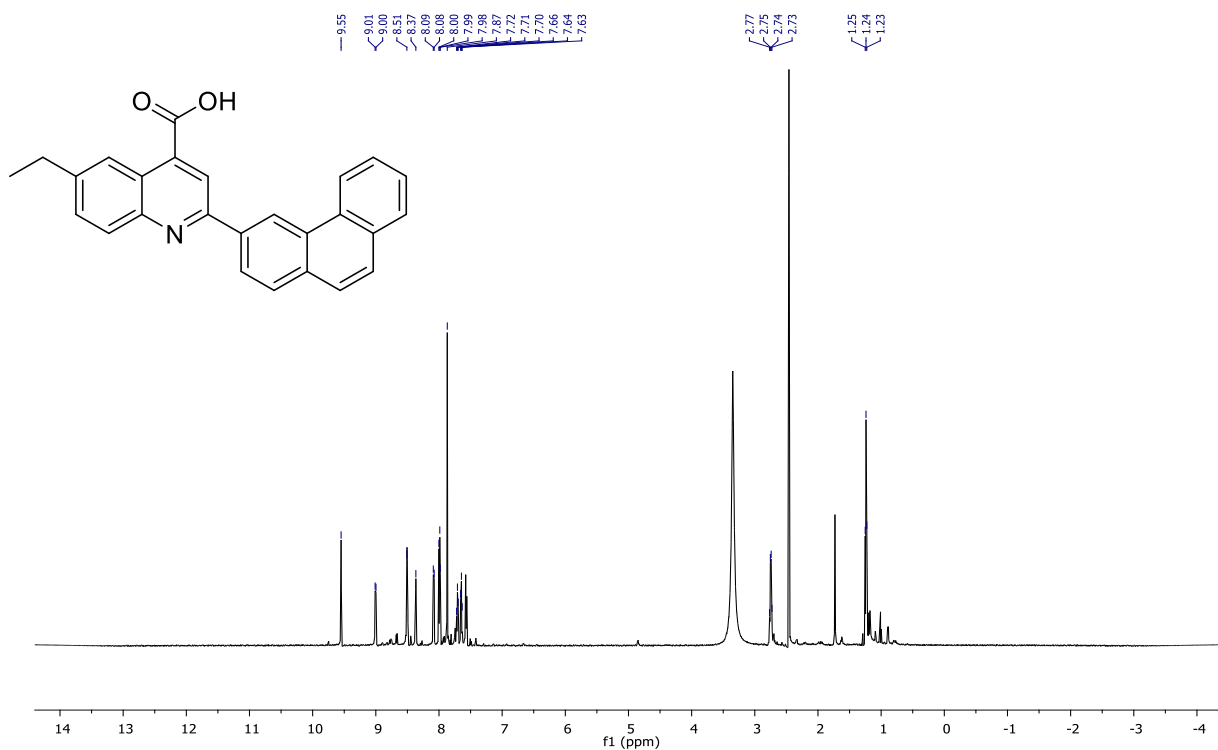

**Figure S49.** 600 MHz <sup>1</sup>H NMR spectrum of **7I** (DMSO-*d*<sub>6</sub>)

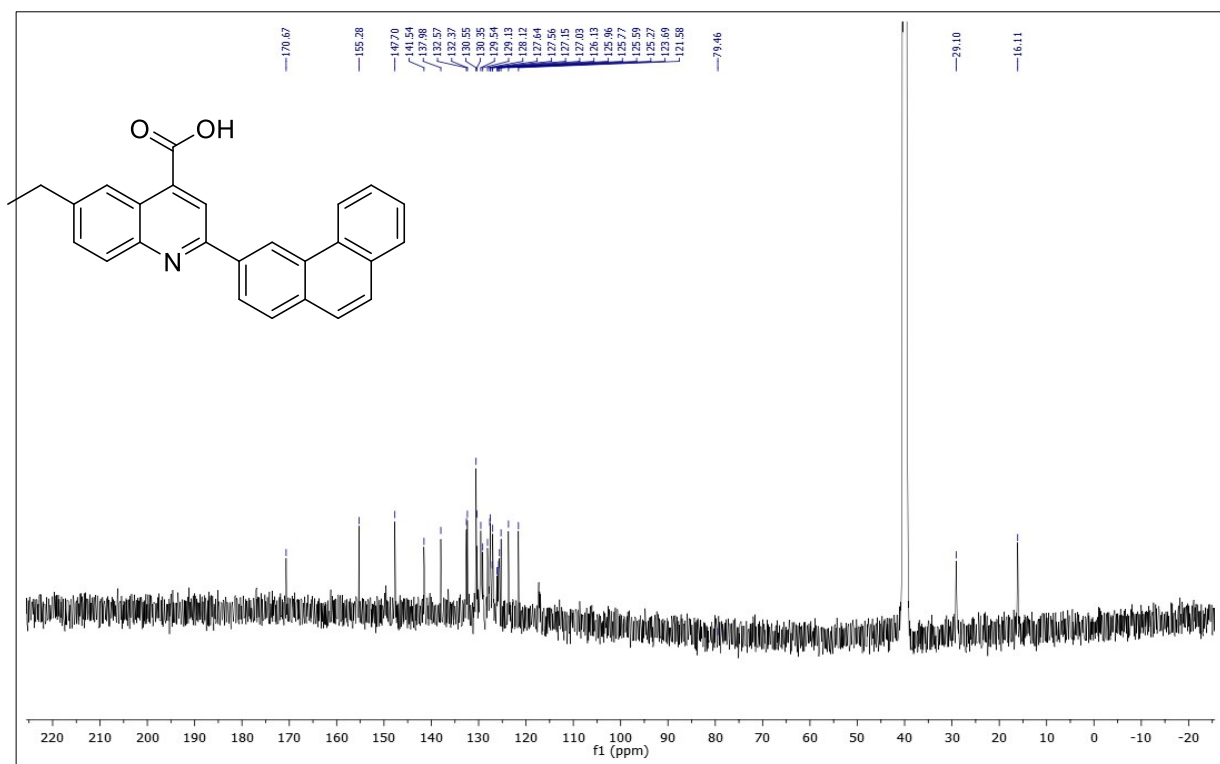

**Figure S50.** 151 MHz <sup>13</sup>C NMR spectrum of **7I** (DMSO-*d*<sub>6</sub>)

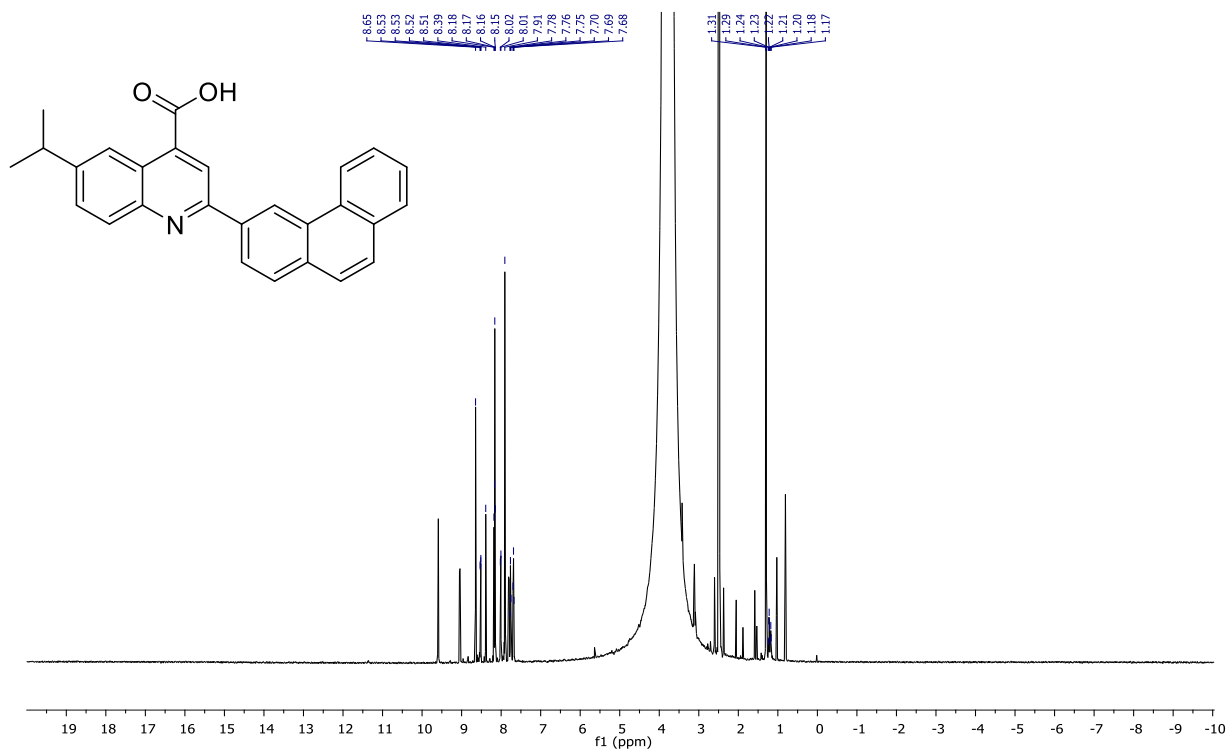

**Figure S51.** 600 MHz <sup>1</sup>H NMR spectrum of **7m** (DMSO-*d*<sub>6</sub>)

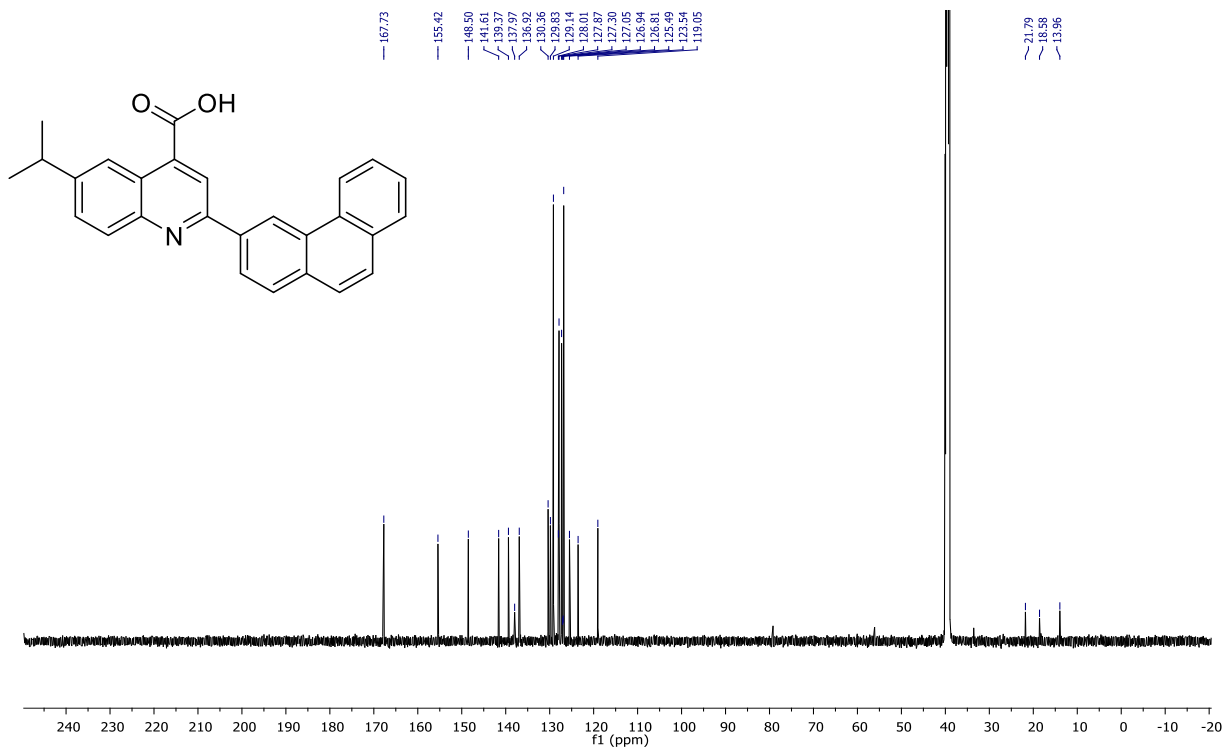

**Figure S52.** 151 MHz <sup>13</sup>C NMR spectrum of **7m** (MeOH-*d*<sub>4</sub>)

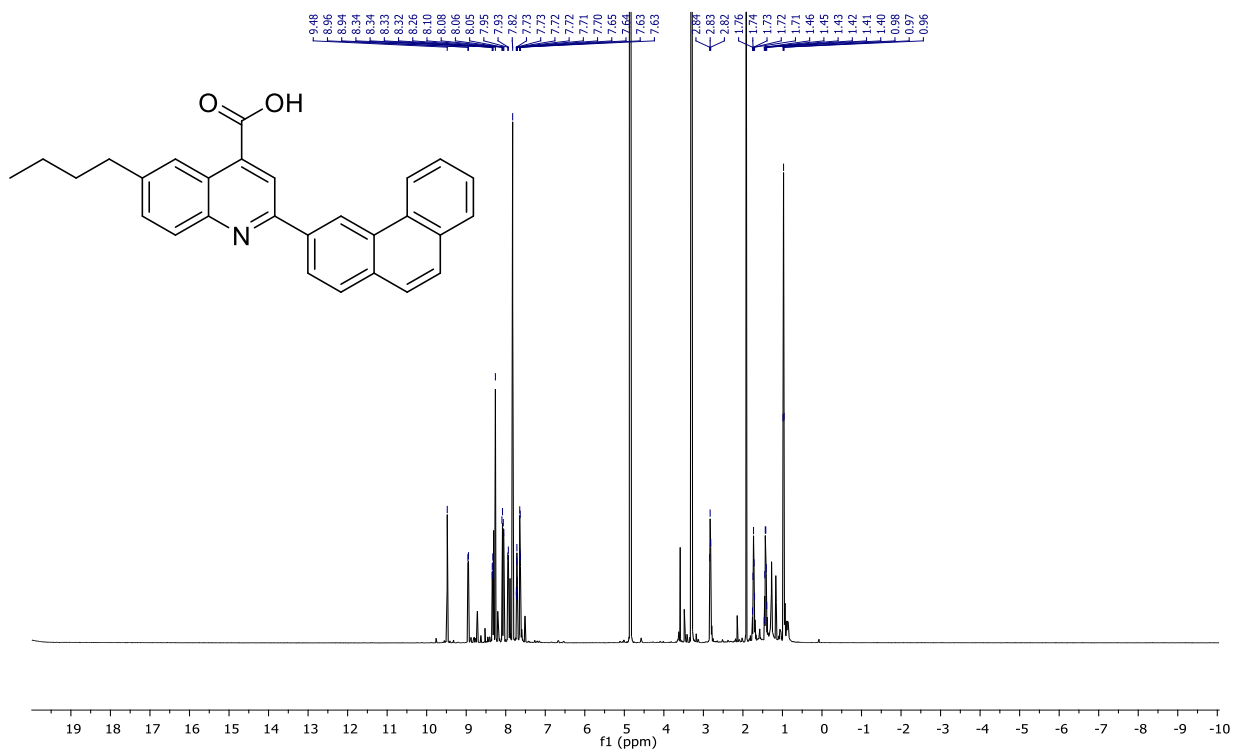

**Figure S53.** 600 MHz <sup>1</sup>H NMR spectrum of **7n** (MeOH-*d*<sub>4</sub>)

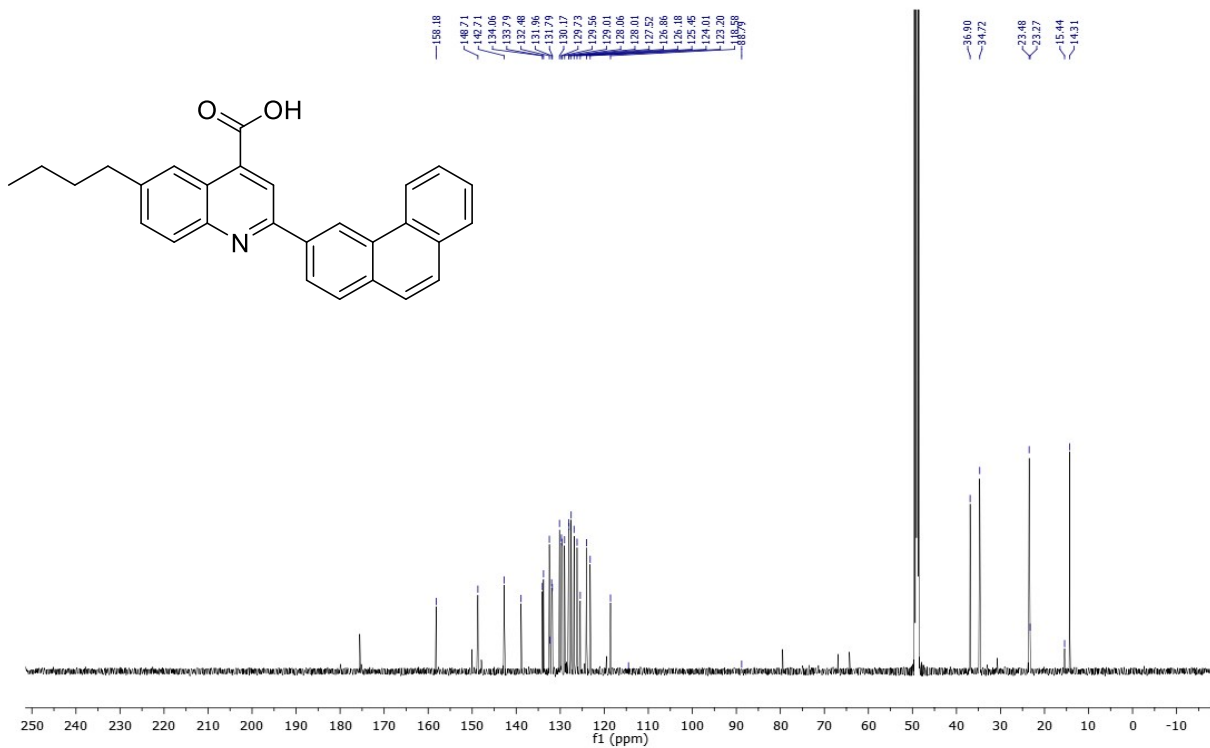

**Figure S54.** 151 MHz <sup>13</sup>C NMR spectrum of **7n** (MeOH-*d*<sub>4</sub>)

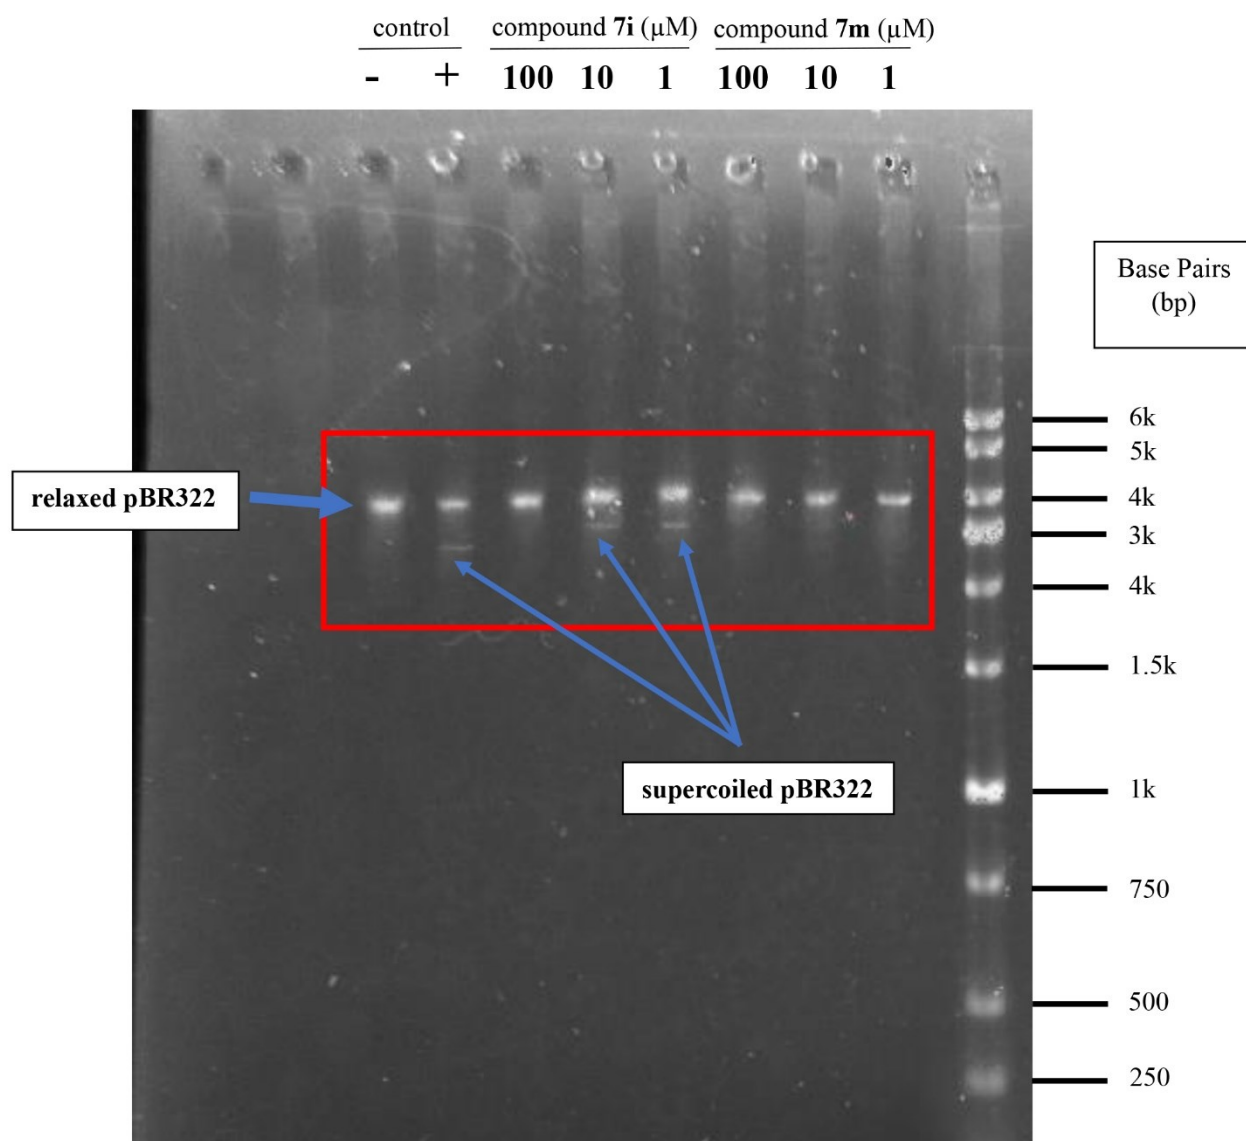

**Figure S55.** Agarose gel electrophoresis result showing inhibition of QCA **7i** and **7m** against *Mtb* DNA gyrase; (-) negative control without gyrase; (+) positive control with gyrase.
